# Supplementary material
Source: PubMed Central journal article supplement (PMC7174518)
Supplement: 11606_2019_5594_MOESM1_ESM.pdf [file 11606_2019_5594_MOESM1_ESM.pdf]

1 **Appendices: (1/9)**

2 **Appendix 1: AHRQ PCMH Definition**

3 Definition of PCMH:

4 The definition of PCMH is based on the existing AHRQ definition and has been used in previous  
5 literature reviews. These measures include:

6 1) Team-based care, defined as a team-based structure in which 2 or more clinicians work together to  
7 provide care.

8 2) An intervention that includes enhanced access to care, coordinated care, comprehensive healthcare  
9 delivery and a systems based approach to improving quality and safety, which includes:

- 10 • Enhanced access to care
- 11 • Coordinated care across settings or specialties
- 12 • Comprehensive care aimed to address a large majority if an individual’s health needs
- 13 • A systems-based approach to improving quality and safety

14 3) A sustained partnership and personal relationship over time that is patient centered

15 4) Reorganization and structural changes to the traditional practice of healthcare delivery

16

17

18

19

20

21

22 **Appendix 2: Database search strategies executed on March 27, 2017**

| <b>PubMed</b> (includes MEDLINE – 1946 to present: Bethesda, Maryland: National Library of Medicine, United States, National Center for Biotechnology Information) |                     |                                                                                                                                                                                                                                                                                                                                                                                                                                                                                                                                                                                                                                                                                                                                                                                                                                                                                                                                                                                                                                                                                                                                                                                                                                                                                                                                                                                                                                                                                                                                                                                                                                                                                                                 |
|--------------------------------------------------------------------------------------------------------------------------------------------------------------------|---------------------|-----------------------------------------------------------------------------------------------------------------------------------------------------------------------------------------------------------------------------------------------------------------------------------------------------------------------------------------------------------------------------------------------------------------------------------------------------------------------------------------------------------------------------------------------------------------------------------------------------------------------------------------------------------------------------------------------------------------------------------------------------------------------------------------------------------------------------------------------------------------------------------------------------------------------------------------------------------------------------------------------------------------------------------------------------------------------------------------------------------------------------------------------------------------------------------------------------------------------------------------------------------------------------------------------------------------------------------------------------------------------------------------------------------------------------------------------------------------------------------------------------------------------------------------------------------------------------------------------------------------------------------------------------------------------------------------------------------------|
| <b>Search Statement</b>                                                                                                                                            | <b>Concept</b>      | <b>Query</b>                                                                                                                                                                                                                                                                                                                                                                                                                                                                                                                                                                                                                                                                                                                                                                                                                                                                                                                                                                                                                                                                                                                                                                                                                                                                                                                                                                                                                                                                                                                                                                                                                                                                                                    |
| #1                                                                                                                                                                 | PCMHs               | advanced primary care[tiab] OR guided care[tiab] OR health care home*[tiab] OR healthcare home*[tiab] OR medical home*[tiab] OR pcmh[tiab] OR pcmhs[tiab] OR patient aligned[tiab] OR primary care home*[tiab] OR guided care[ot] OR health care home*[ot] OR healthcare home*[ot] OR medical home*[ot] OR pcmh[ot] OR patient aligned[ot] OR primary care home*[ot]                                                                                                                                                                                                                                                                                                                                                                                                                                                                                                                                                                                                                                                                                                                                                                                                                                                                                                                                                                                                                                                                                                                                                                                                                                                                                                                                            |
| #2                                                                                                                                                                 | Components of PCMHs | "Case Management"[MeSH] OR "Continuity of Patient Care"[MeSH:NoExp] OR "Delivery of Health Care, Integrated"[MeSH] OR "Disease Management"[MeSH] OR "Patient Care Management"[MeSH:NoExp] OR "Patient Care Planning"[MeSH:NoExp] OR "Patient Care Team"[Mesh:NoExp] OR "Patient-Centered Care"[MeSH] OR care manage*[tiab] OR care redesign[tiab] OR care team*[tiab] OR case manage*[tiab] OR centered care[tiab] OR centered health*[tiab] OR chronic care model*[tiab] OR collaborative care[tiab] OR collaboratives[tiab] OR continuity of care[tiab] OR continuity of patient care[tiab] OR disease manage*[tiab] OR health care team*[tiab] OR health team*[tiab] OR healthcare team*[tiab] OR integrated delivery[tiab] OR integrated health*[tiab] OR inter disciplinary team*[tiab] OR interdisciplinary care[tiab] OR interdisciplinary team*[tiab] OR multi disciplinary care[tiab] OR multi disciplinary team*[tiab] OR multidisciplinary care[tiab] OR multidisciplinary team*[tiab] OR patient center*[tiab] OR system redesign[tiab] OR systems redesign[tiab] OR care manage*[ot] OR care redesign[ot] OR care team*[ot] OR case manage*[ot] OR centered care[ot] OR chronic care model*[ot] OR collaborative care[ot] OR collaboratives[ot] OR continuity of care[ot] OR continuity of patient care[ot] OR disease manage*[ot] OR health team*[ot] OR healthcare team*[ot] OR integrated delivery[ot] OR integrated health*[ot] OR interdisciplinary care[ot] OR interdisciplinary team*[ot] OR multi disciplinary care[ot] OR multi disciplinary team*[ot] OR multidisciplinary care[ot] OR multidisciplinary team*[ot] OR patient center*[ot] OR system redesign[ot] OR systems redesign[ot] |

23

24

| <b>EMBASE.com</b> (1974 to present: Amsterdam, Netherland: Elsevier Science) |                |                                                                                                                          |
|------------------------------------------------------------------------------|----------------|--------------------------------------------------------------------------------------------------------------------------|
| <b>Search Statement</b>                                                      | <b>Concept</b> | <b>Query</b>                                                                                                             |
| #1                                                                           | PCMHs          | 'advanced primary care' OR 'guided care' OR health NEXT/1 care NEXT/1 home* OR healthcare NEXT/1 home* OR medical NEXT/1 |

|    |                          |                                                                                                                                                                                                                                                                                                                                                                                                                                                                                                                                                                                                                                                                                                                                                                                                                                                                                                                                                                                                                                                                                                                                                                                                                                                                                                                                                                                                                                                                                |
|----|--------------------------|--------------------------------------------------------------------------------------------------------------------------------------------------------------------------------------------------------------------------------------------------------------------------------------------------------------------------------------------------------------------------------------------------------------------------------------------------------------------------------------------------------------------------------------------------------------------------------------------------------------------------------------------------------------------------------------------------------------------------------------------------------------------------------------------------------------------------------------------------------------------------------------------------------------------------------------------------------------------------------------------------------------------------------------------------------------------------------------------------------------------------------------------------------------------------------------------------------------------------------------------------------------------------------------------------------------------------------------------------------------------------------------------------------------------------------------------------------------------------------|
|    |                          | home* OR 'pcmh' OR 'pcmhs' OR 'patient aligned' OR primary NEXT/1 care NEXT/1 home*                                                                                                                                                                                                                                                                                                                                                                                                                                                                                                                                                                                                                                                                                                                                                                                                                                                                                                                                                                                                                                                                                                                                                                                                                                                                                                                                                                                            |
| #3 | Settings and Specialties | "Ambulatory Care"[MeSH] OR "Ambulatory Care Facilities"[MeSH:NoExp] OR "Community Health Centers"[MeSH:NoExp] OR "Community Health Services"[MeSH:NoExp] OR "Community Medicine"[MeSH] OR "Community Networks"[MeSH] OR "Family Practice"[MeSH] OR "General Practice"[MeSH] OR "Geriatrics"[MeSH] OR "Health Care Coalitions"[MeSH] OR "Health Services for the Aged"[MeSH] OR "Internal Medicine"[MeSH] OR "Outpatient Clinics, Hospital"[MeSH:NoExp] OR "Physicians, Family"[MeSH] OR "Physicians, Primary Care"[MeSH] OR "Primary Health Care"[MeSH:NoExp] OR ambulatory care[tiab] OR community medicine[tiab] OR family physician*[tiab] OR family pract*[tiab] OR general clinical pract*[tiab] OR general medical pract*[tiab] OR general medicine[tiab] OR general physician*[tiab] OR general pract*[tiab] OR geriatric[tiab] OR geriatrician*[tiab] OR geriatrics[tiab] OR gp[tiab] OR gps[tiab] OR internal medicine[tiab] OR internist*[tiab] OR pcp[tiab] OR pcps[tiab] OR primary care[tiab] OR primary health[tiab] OR primary medical care[tiab] OR primary pract*[tiab] OR ambulatory care[ot] OR community medicine[ot] OR family physician*[ot] OR family pract*[ot] OR general medicine[ot] OR general physician*[ot] OR general pract*[ot] OR geriatric[ot] OR geriatrician*[ot] OR geriatrics[ot] OR gp[ot] OR gps[ot] OR internal medicine[ot] OR internist*[ot] OR pcp[ot] OR pcps[ot] OR primary care[ot] OR primary health[ot] OR primary pract*[ot] |
| #4 | Diseases and Conditions  | "Angina Pectoris"[MeSH:NoExp] OR "Anxiety"[MeSH] OR "Anxiety Disorders"[MeSH] OR "Asthma"[MeSH:NoExp] OR "Cardiovascular Diseases"[MeSH:NoExp] OR "Chronic Disease"[MeSH] OR "Coronary Disease"[MeSH] OR "Depression"[MeSH] OR "Depressive Disorder"[MeSH] OR "Diabetes Mellitus"[MeSH] OR "Heart Failure"[MeSH] OR "Hyperlipidemias"[MeSH] OR "Hypertension"[MeSH:NoExp] OR "Low Back Pain"[MeSH] OR "Obesity"[MeSH:NoExp] OR "Obesity Hypoventilation Syndrome"[MeSH] OR "Obesity, Abdominal"[MeSH] OR "Obesity, Metabolically Benign"[MeSH] OR "Obesity, Morbid"[MeSH] OR "Overweight"[MeSH] OR angina[tiab] OR asthma[tiab] OR anxiety[tiab] OR back pain*[tiab] OR backach*[tiab] OR cardiovascular dis*[tiab] OR chronic disease*[tiab] OR chronic disorder*[tiab] OR chronic illness*[tiab] OR chronically ill[tiab] OR coronary disease*[tiab] OR coronary heart disease*[tiab] OR depress*[tiab] OR diabet*[tiab] OR heart failure*[tiab] OR hyperlipidaem*[tiab] OR hyperlipidem*[tiab] OR hypertens*[tiab] OR obese[tiab] OR obesity[tiab] OR overweight[tiab] OR angina[ot] OR asthma[ot]                                                                                                                                                                                                                                                                                                                                                                          |

|    |                                                                                                                           |                                                                                                                                                                                                                                                                                                                                                                                                                                                                                                                                                                                                                                                                                                                                                                                                                                                                                                                                                                                                                                                                                                                |
|----|---------------------------------------------------------------------------------------------------------------------------|----------------------------------------------------------------------------------------------------------------------------------------------------------------------------------------------------------------------------------------------------------------------------------------------------------------------------------------------------------------------------------------------------------------------------------------------------------------------------------------------------------------------------------------------------------------------------------------------------------------------------------------------------------------------------------------------------------------------------------------------------------------------------------------------------------------------------------------------------------------------------------------------------------------------------------------------------------------------------------------------------------------------------------------------------------------------------------------------------------------|
|    |                                                                                                                           | OR anxiety[ot] OR back pain*[ot] OR backach*[ot] OR cardiovascular dis*[ot] OR chronic disease*[ot] OR chronic disorder*[ot] OR chronic illness*[ot] OR chronically ill[ot]<br>OR coronary disease*[ot] OR coronary heart disease*[ot] OR depress*[ot] OR diabet*[ot] OR heart failure*[ot] OR hyperlipidaem*[ot] OR hyperlipidem*[ot] OR hypertens*[ot] OR obese[ot] OR obesity[ot]                                                                                                                                                                                                                                                                                                                                                                                                                                                                                                                                                                                                                                                                                                                           |
| #5 |                                                                                                                           | #2 AND #3 AND #4                                                                                                                                                                                                                                                                                                                                                                                                                                                                                                                                                                                                                                                                                                                                                                                                                                                                                                                                                                                                                                                                                               |
| #6 | Components of PCMHs<br><br>focused search restricting Mesh terms to major topic and keywords in the title field only      | "Case Management"[Majr] OR "Continuity of Patient Care"[Majr:NoExp] OR "Delivery of Health Care, Integrated"[Majr] OR "Disease Management"[Majr] OR "Patient Care Management"[Majr:NoExp] OR "Patient Care Planning"[Majr:NoExp] OR "Patient Care Team"[Majr:NoExp] OR "Patient-Centered Care"[Majr] OR care manage*[title] OR care redesign[title] OR care team*[title] OR case manage*[title] OR centered care[title] OR centered health*[title] OR chronic care model*[title] OR collaborative care[title] OR collaboratives[title] OR continuity of care[title] OR continuity of patient care[title] OR disease manage*[title] OR health care team*[title] OR health team*[title] OR healthcare team*[title] OR integrated delivery[title] OR integrated health*[title] OR inter disciplinary team*[title] OR interdisciplinary care[title] OR interdisciplinary team*[title] OR multi disciplinary care[title] OR multi disciplinary team*[title] OR multidisciplinary care[title] OR multidisciplinary team*[title] OR patient center*[title] OR system redesign[title] OR systems redesign[title]       |
| #7 | Settings and Specialties<br><br>focused search restricting Mesh terms to major topic and keywords in the title field only | "Ambulatory Care"[Majr] OR "Ambulatory Care Facilities"[Majr:NoExp] OR "Community Health Centers"[Majr:NoExp] OR "Community Health Services"[Majr:NoExp] OR "Community Medicine"[Majr] OR "Community Networks"[Majr] OR "Family Practice"[Majr] OR "General Practice"[Majr] OR "Geriatrics"[Majr] OR "Health Care Coalitions"[Majr] OR "Health Services for the Aged"[Majr] OR "Internal Medicine"[Majr] OR "Outpatient Clinics, Hospital"[Majr:NoExp] OR "Physicians, Family"[Majr] OR "Physicians, Primary Care"[Majr] OR "Primary Health Care"[Majr:NoExp] OR ambulatory care[title] OR community medicine[title] OR family physician*[title] OR family pract*[title] OR general clinical pract*[title] OR general medical pract*[title] OR general medicine[title] OR general physician*[title] OR general pract*[title] OR geriatric[title] OR geriatrician*[title] OR geriatrics[title] OR gp[title] OR gps[title] OR internal medicine[title] OR internist*[title] OR pcp[title] OR pcps[title] OR primary care[title] OR primary health[title] OR primary medical care[title] OR primary pract*[title] |
| #8 |                                                                                                                           | #6 AND #7                                                                                                                                                                                                                                                                                                                                                                                                                                                                                                                                                                                                                                                                                                                                                                                                                                                                                                                                                                                                                                                                                                      |
| #9 |                                                                                                                           | #5 OR #8                                                                                                                                                                                                                                                                                                                                                                                                                                                                                                                                                                                                                                                                                                                                                                                                                                                                                                                                                                                                                                                                                                       |

|     |                                       |                                                                                                                                                                                                                                                                                                                                                                                                                                                                                                                                                                                                                                                                                                                                                                                                                                                                                                                                                                                                                                                                                                                                                                                                                                                                                                                                                                                                                                                                                                                                                                                                                                                                                                                                                                                                                                                                                                                                                                                                                                                                                                                                                                                                                                  |
|-----|---------------------------------------|----------------------------------------------------------------------------------------------------------------------------------------------------------------------------------------------------------------------------------------------------------------------------------------------------------------------------------------------------------------------------------------------------------------------------------------------------------------------------------------------------------------------------------------------------------------------------------------------------------------------------------------------------------------------------------------------------------------------------------------------------------------------------------------------------------------------------------------------------------------------------------------------------------------------------------------------------------------------------------------------------------------------------------------------------------------------------------------------------------------------------------------------------------------------------------------------------------------------------------------------------------------------------------------------------------------------------------------------------------------------------------------------------------------------------------------------------------------------------------------------------------------------------------------------------------------------------------------------------------------------------------------------------------------------------------------------------------------------------------------------------------------------------------------------------------------------------------------------------------------------------------------------------------------------------------------------------------------------------------------------------------------------------------------------------------------------------------------------------------------------------------------------------------------------------------------------------------------------------------|
| #10 | Study Types and Study Characteristics | <p>"Clinical Study" [Publication Type] OR "Comparative Study" [Publication Type] OR "Double-Blind Method"[MeSH] OR "Economics"[MeSH] OR "economics" [Subheading] OR "Epidemiologic Studies"[MeSH] OR "Epidemiologic Study Characteristics as Topic"[MeSH] OR "Evaluation Studies" [Publication Type] OR "Evaluation Studies as Topic"[MeSH] OR "Interrupted Time Series Analysis"[MeSH] OR "Meta-Analysis" [Publication Type] OR "Program Evaluation"[MeSH] OR "Quality of Health Care"[MeSH] OR "Random Allocation"[MeSH] OR "Single-Blind Method"[MeSH] OR "Treatment Outcome"[MeSH] OR "Validation Studies" [Publication Type] OR "utilization"[Subheading] OR case control*[tiab] OR cohort study[tiab] OR cohort studies[tiab] OR cohort analy*[tiab] OR comparative[tiab] OR comparison[tiab] OR cost of health care[tiab] OR cost of health care[ot] OR cross sectional[tiab] OR demonstration[tiab] OR evaluation study[tiab] OR evaluation studies[tiab] OR follow up study[tiab] OR follow up studies[tiab] OR intervention[tiab] OR longitudinal[tiab] OR matched[tiab] OR meta-analys*[tiab] OR multi center study[tiab] OR multi centre studies[tiab] OR multicenter study[tiab] OR multicentre studies[tiab] OR observational study[tiab] OR observational studies[tiab] OR pre test*[tiab] OR pretest*[tiab] OR post test*[tiab] OR posttest*[tiab] OR quality of care[tiab] OR quasi control*[tiab] OR quasi experiment*[tiab] OR quasicontrol*[tiab] OR quasiexperiment*[tiab] OR quasirandom*[tiab] OR retrospective[tiab] OR random*[tiab] OR rct[tiab] OR rcts[tiab] OR time point*[tiab] OR timepoint*[tiab] OR utilization[tiab] OR validation study[tiab] OR validation studies[tiab] OR systematic[sb] OR ((singl*[tiab] or doubl*[tiab] or treb*[tiab] or tripl*[tiab]) AND (blind*[tiab] or mask*[tiab])) OR ((clinical[tiab] OR cluster[tiab] OR multi center[tiab] OR multi centre[tiab] OR multicenter[tiab] OR multicentre[tiab] OR clinical[ot] OR cluster[ot] OR multi center[ot] OR multi centre[ot] OR multicenter[ot] OR multicentre[ot]) AND (trial[tiab] OR trials[tiab] OR trial[ot] OR trials[ot])) OR (continuing[tiab] AND study[tiab]) OR (time series[tiab] AND interrupt*[tiab])</p> |
| #11 |                                       | #9 AND #10                                                                                                                                                                                                                                                                                                                                                                                                                                                                                                                                                                                                                                                                                                                                                                                                                                                                                                                                                                                                                                                                                                                                                                                                                                                                                                                                                                                                                                                                                                                                                                                                                                                                                                                                                                                                                                                                                                                                                                                                                                                                                                                                                                                                                       |
| #12 |                                       | #1 OR #11                                                                                                                                                                                                                                                                                                                                                                                                                                                                                                                                                                                                                                                                                                                                                                                                                                                                                                                                                                                                                                                                                                                                                                                                                                                                                                                                                                                                                                                                                                                                                                                                                                                                                                                                                                                                                                                                                                                                                                                                                                                                                                                                                                                                                        |
| #13 | Publication Date Limit 2004 to 2017   | "2004/01/01"[PDAT] : "2017/12/31"[PDAT]                                                                                                                                                                                                                                                                                                                                                                                                                                                                                                                                                                                                                                                                                                                                                                                                                                                                                                                                                                                                                                                                                                                                                                                                                                                                                                                                                                                                                                                                                                                                                                                                                                                                                                                                                                                                                                                                                                                                                                                                                                                                                                                                                                                          |
| #14 |                                       | #12 AND #13                                                                                                                                                                                                                                                                                                                                                                                                                                                                                                                                                                                                                                                                                                                                                                                                                                                                                                                                                                                                                                                                                                                                                                                                                                                                                                                                                                                                                                                                                                                                                                                                                                                                                                                                                                                                                                                                                                                                                                                                                                                                                                                                                                                                                      |

|     |                          |                                                                                                                                                                                                                                                                                                                                                                                                                                                                                                                                                                                                                                                                                                                                                                                                                                                                                                                                                                                                                                                                                                            |
|-----|--------------------------|------------------------------------------------------------------------------------------------------------------------------------------------------------------------------------------------------------------------------------------------------------------------------------------------------------------------------------------------------------------------------------------------------------------------------------------------------------------------------------------------------------------------------------------------------------------------------------------------------------------------------------------------------------------------------------------------------------------------------------------------------------------------------------------------------------------------------------------------------------------------------------------------------------------------------------------------------------------------------------------------------------------------------------------------------------------------------------------------------------|
|     |                          |                                                                                                                                                                                                                                                                                                                                                                                                                                                                                                                                                                                                                                                                                                                                                                                                                                                                                                                                                                                                                                                                                                            |
| #15 | English Language Limit   | English[language]                                                                                                                                                                                                                                                                                                                                                                                                                                                                                                                                                                                                                                                                                                                                                                                                                                                                                                                                                                                                                                                                                          |
| #16 |                          | #14 AND #15                                                                                                                                                                                                                                                                                                                                                                                                                                                                                                                                                                                                                                                                                                                                                                                                                                                                                                                                                                                                                                                                                                |
| #17 | Publication Type Removal | "Case Reports" [Publication Type] OR "Editorial" [Publication Type] OR "Historical Article"[Publication Type] OR "Letter" [Publication Type] OR "Practice Guideline" [Publication Type] OR "Practice Guidelines as Topic"[MeSH] OR case report[tiab] OR case reports[tiab] OR practice guideline[title]                                                                                                                                                                                                                                                                                                                                                                                                                                                                                                                                                                                                                                                                                                                                                                                                    |
| #18 |                          | #16 NOT #17                                                                                                                                                                                                                                                                                                                                                                                                                                                                                                                                                                                                                                                                                                                                                                                                                                                                                                                                                                                                                                                                                                |
| #2  | Components of PCMHs      | 'case management'/de OR 'disease management'/de OR 'integrated health care system'/de OR 'patient care'/de OR 'patient care planning'/de OR (care NEXT/1 manage*):ti,ab OR 'care redesign':ti,ab OR (care NEXT/1 team*):ti,ab OR (case NEXT/1 manage*):ti,ab OR 'centered care':ti,ab OR (centered NEXT/1 health*):ti,ab OR (chronic NEXT/1 care NEXT/1 model*):ti,ab OR 'collaborative care':ti,ab OR collaboratives:ti,ab OR 'continuity of care':ti,ab OR 'continuity of patient care':ti,ab OR (disease NEXT/1 manage*):ti,ab OR (health NEXT/1 team*):ti,ab OR (health NEXT/1 care NEXT/1 team*):ti,ab OR (healthcare NEXT/1 team*):ti,ab OR 'integrated delivery':ti,ab OR (integrated NEXT/1 health*):ti,ab OR (inter NEXT/1 disciplinary NEXT/1 team*):ti,ab OR 'interdisciplinary care':ti,ab OR (interdisciplinary NEXT/1 team*):ti,ab OR 'multi disciplinary care':ti,ab OR (multi NEXT/1 disciplinary NEXT/1 team*):ti,ab OR 'multidisciplinary care':ti,ab OR (multidisciplinary NEXT/1 team*):ti,ab OR (patient NEXT/1 center*):ti,ab OR 'system redesign':ti,ab OR 'systems redesign':ti,ab |
| #3  | Settings and Specialties | 'ambulatory care'/de OR 'community care'/de OR 'community medicine'/de OR 'elderly care'/de OR 'family health'/de OR 'general practice'/de OR 'general practitioner'/de OR 'geriatric care'/de OR 'geriatrician'/de OR 'geriatrics'/de OR 'gerontologist'/de OR 'internal medicine'/de OR 'internist'/de OR 'outpatient care'/de OR 'outpatient department'/de OR 'primary health care'/de OR 'primary medical care'/de OR 'ambulatory care':ti,ab OR (community NEXT/1 health NEXT/1 service*):ti,ab OR 'community medicine':ti,ab OR (community NEXT/1 network*):ti,ab OR (family NEXT/1 physician*):ti,ab OR (family NEXT/1 pract*):ti,ab OR (general NEXT/1 medical NEXT/1 practice*):ti,ab OR 'general medicine':ti,ab OR (general NEXT/1 physician*):ti,ab OR (general NEXT/1 pract*):ti,ab OR gp:ti,ab OR 'internal medicine':ti,ab OR pcp:ti,ab OR pcps:ti,ab OR 'primary care':ti,ab OR 'primary health':ti,ab OR (primary NEXT/1 medical NEXT/1 care):ti,ab OR (primary NEXT/1 pract*):ti,ab                                                                                                     |
| #4  | Diseases and Conditions  | 'angina pectoris'/de OR 'anxiety'/de OR 'anxiety disorder'/de OR 'asthma'/de OR 'backache'/de OR 'cardiovascular disease'/de OR 'chronic disease'/de OR 'coronary artery disease'/de OR                                                                                                                                                                                                                                                                                                                                                                                                                                                                                                                                                                                                                                                                                                                                                                                                                                                                                                                    |

|    |                                                                                                                             |                                                                                                                                                                                                                                                                                                                                                                                                                                                                                                                                                                                                                                                                                                                                                                                                                                                                                                                                                                                                                           |
|----|-----------------------------------------------------------------------------------------------------------------------------|---------------------------------------------------------------------------------------------------------------------------------------------------------------------------------------------------------------------------------------------------------------------------------------------------------------------------------------------------------------------------------------------------------------------------------------------------------------------------------------------------------------------------------------------------------------------------------------------------------------------------------------------------------------------------------------------------------------------------------------------------------------------------------------------------------------------------------------------------------------------------------------------------------------------------------------------------------------------------------------------------------------------------|
|    |                                                                                                                             | 'depression'/de OR 'major depression'/de OR 'diabetes mellitus'/de OR 'insulin dependent diabetes mellitus'/de OR 'non insulin dependent diabetes mellitus'/de OR 'congestive heart failure'/exp OR 'heart failure'/de OR 'hyperlipidemia'/de OR 'hypertension'/de OR 'low back pain'/de OR 'obesity'/de OR 'obesity hypoventilation syndrome'/de OR 'abdominal obesity'/de OR 'metabolically benign obesity'/de OR 'morbid obesity'/de OR angina:ti,ab OR anxiety:ti,ab OR asthma:ti,ab OR (back NEXT/1 pain*):ti,ab OR backache*:ti,ab OR (cardiovascular NEXT/1 dis*):ti OR (chronic NEXT/1 disease*):ti,ab OR (chronic NEXT/1 disorder*):ti,ab OR (chronic NEXT/1 illness*):ti,ab OR (chronically NEXT/1 ill):ti,ab OR (coronary NEXT/1 disease*):ti,ab OR (coronary NEXT/1 heart NEXT/1 disease*):ti,ab OR depress*:ti,ab OR diabet*:ti,ab OR (heart NEXT/1 failure*):ti,ab OR hyperlipidaem*:ti,ab OR hyperlipidem*:ti,ab OR hypertens*:ti,ab OR obese:ti,ab OR obesity:ti,ab                                       |
| #5 |                                                                                                                             | #2 AND #3 AND #4                                                                                                                                                                                                                                                                                                                                                                                                                                                                                                                                                                                                                                                                                                                                                                                                                                                                                                                                                                                                          |
| #6 | Components of PCMHs<br><br>focused search restricting EMTREE terms to major topic and keywords in the title field only      | 'case management'/mj OR 'disease management'/mj OR 'integrated health care system'/mj OR 'patient care'/mj OR 'patient care planning'/mj OR (care NEXT/1 manage*):ti OR 'care redesign':ti OR (care NEXT/1 team*):ti OR (case NEXT/1 manage*):ti OR 'centered care':ti OR (centered NEXT/1 health*):ti OR (chronic NEXT/1 care NEXT/1 model*):ti OR 'collaborative care':ti OR collaboratives:ti OR 'continuity of care':ti OR 'continuity of patient care':ti OR (disease NEXT/1 manage*):ti OR (health NEXT/1 team*):ti OR (health NEXT/1 care NEXT/1 team*):ti OR (healthcare NEXT/1 team*):ti OR 'integrated delivery':ti OR (integrated NEXT/1 health*):ti OR (inter NEXT/1 disciplinary NEXT/1 team*):ti OR 'interdisciplinary care':ti OR (interdisciplinary NEXT/1 team*):ti OR 'multi disciplinary care':ti OR (multi NEXT/1 disciplinary NEXT/1 team*):ti OR 'multidisciplinary care':ti OR (multidisciplinary NEXT/1 team*):ti OR (patient NEXT/1 center*):ti OR 'system redesign':ti OR 'systems redesign':ti |
| #7 | Settings and Specialties<br><br>focused search restricting EMTREE terms to major topic and keywords in the title field only | 'ambulatory care'/mj OR 'community care'/mj OR 'community medicine'/mj OR 'elderly care'/mj OR 'family health'/mj OR 'general practice'/mj OR 'general practitioner'/mj OR 'geriatric care'/mj OR 'geriatrician'/mj OR 'geriatrics'/mj OR 'gerontologist'/mj OR 'internal medicine'/mj OR 'internist'/mj OR 'outpatient care'/mj OR 'outpatient department'/mj OR 'primary health care'/mj OR 'primary medical care'/mj OR 'ambulatory care':ti OR (community NEXT/1 health NEXT/1 service*):ti OR 'community medicine':ti OR (community NEXT/1 network*):ti OR (family NEXT/1 physician*):ti OR (family NEXT/1 pract*):ti OR (general NEXT/1 medical NEXT/1 practice*):ti OR 'general medicine':ti OR (general NEXT/1 physician*):ti OR (general NEXT/1 pract*):ti OR gp:ti OR 'internal medicine':ti OR pcp:ti OR pcps:ti OR 'primary care':ti OR 'primary health':ti OR (primary NEXT/1 medical NEXT/1 care):ti OR (primary NEXT/1 pract*):ti                                                                          |
| #8 |                                                                                                                             | #6 AND #7                                                                                                                                                                                                                                                                                                                                                                                                                                                                                                                                                                                                                                                                                                                                                                                                                                                                                                                                                                                                                 |

|     |                                       |                                                                                                                                                                                                                                                                                                                                                                                                                                                                                                                                                                                                                                                                                                                                                                                                                                                                                                                                                                                                                                                                                                                     |
|-----|---------------------------------------|---------------------------------------------------------------------------------------------------------------------------------------------------------------------------------------------------------------------------------------------------------------------------------------------------------------------------------------------------------------------------------------------------------------------------------------------------------------------------------------------------------------------------------------------------------------------------------------------------------------------------------------------------------------------------------------------------------------------------------------------------------------------------------------------------------------------------------------------------------------------------------------------------------------------------------------------------------------------------------------------------------------------------------------------------------------------------------------------------------------------|
| #9  |                                       | #5 OR #8                                                                                                                                                                                                                                                                                                                                                                                                                                                                                                                                                                                                                                                                                                                                                                                                                                                                                                                                                                                                                                                                                                            |
| #10 | Study Types and Study Characteristics | 'clinical study'/exp OR 'comparative study'/exp OR 'controlled study'/exp OR 'economic aspect'/exp OR 'evaluation study'/exp OR 'evidence based medicine'/exp OR 'follow up' NEXT/1 stud* OR 'health care quality'/de OR 'health care utilization'/de OR 'treatment outcome'/exp OR 'validation study'/exp OR cohort NEXT/1 analy* OR comparative OR comparison OR (continuing AND study) OR 'control group' OR 'cross sectional' OR demonstration OR 'double blind' OR intervention OR longitudinal OR matched OR 'multicenter study' OR 'observational study' OR 'observational studies' OR pretest* OR pre NEXT/1 test* OR posttest* OR post NEXT/1 test* OR program NEXT/1 evaluat* OR quasi NEXT/1 experiment* OR quasiexperiment* OR quasirandom* OR quasi NEXT/1 control* OR quasicontrol* OR 'quality of care' OR random* OR rct OR rcts OR retrospective OR 'single blind' OR 'systematic review' OR time NEXT/1 point* OR timepoint* OR 'triple blind' OR (clinical OR cluster OR 'multi center' OR 'multi centre' OR multicenter OR multicentre AND (trial OR trials)) OR ('time series' AND interrupt*) |
| #11 |                                       | #9 AND #10                                                                                                                                                                                                                                                                                                                                                                                                                                                                                                                                                                                                                                                                                                                                                                                                                                                                                                                                                                                                                                                                                                          |
| #12 |                                       | #1 OR #11                                                                                                                                                                                                                                                                                                                                                                                                                                                                                                                                                                                                                                                                                                                                                                                                                                                                                                                                                                                                                                                                                                           |
| #13 | Publication date limit 2004-2017      | [2004-2017]/py                                                                                                                                                                                                                                                                                                                                                                                                                                                                                                                                                                                                                                                                                                                                                                                                                                                                                                                                                                                                                                                                                                      |
| #14 | English Language Limit                | [english]/lim                                                                                                                                                                                                                                                                                                                                                                                                                                                                                                                                                                                                                                                                                                                                                                                                                                                                                                                                                                                                                                                                                                       |
| #15 |                                       | #12 AND #13 AND #14                                                                                                                                                                                                                                                                                                                                                                                                                                                                                                                                                                                                                                                                                                                                                                                                                                                                                                                                                                                                                                                                                                 |
| #16 | Publication Type Removal              | 'case report' OR 'case reports' OR 'conference abstract'/it OR 'conference review'/it OR 'editorial'/it OR 'letter'/it OR 'practice guideline'/de                                                                                                                                                                                                                                                                                                                                                                                                                                                                                                                                                                                                                                                                                                                                                                                                                                                                                                                                                                   |
| #17 |                                       | #15 NOT #16                                                                                                                                                                                                                                                                                                                                                                                                                                                                                                                                                                                                                                                                                                                                                                                                                                                                                                                                                                                                                                                                                                         |

25

| <b>The Cochrane Library</b> (John Wiley & Sons.): CDSR (Cochrane Database of Systematic Reviews): Issue 3 of 12, March 2017; DARE (Database of Abstracts of Reviews of Effect): Issue 2 of 4, April 2015; TRIALS (Cochrane Central Register of Controlled Trials): Issue 2 of 12, February 2017; Cochrane Methodology Register : Issue 3 of 4, July 2012; HTAD (Health Technology Assessment Database) : Issue 4 of 4, October 2016; NHSEED (NHS Economic Evaluation Database): Issue 2 of 4, April 2015 |         |                                                                                                                                                                                                                                           |
|----------------------------------------------------------------------------------------------------------------------------------------------------------------------------------------------------------------------------------------------------------------------------------------------------------------------------------------------------------------------------------------------------------------------------------------------------------------------------------------------------------|---------|-------------------------------------------------------------------------------------------------------------------------------------------------------------------------------------------------------------------------------------------|
| Search Statement                                                                                                                                                                                                                                                                                                                                                                                                                                                                                         | Concept | Query                                                                                                                                                                                                                                     |
| #1                                                                                                                                                                                                                                                                                                                                                                                                                                                                                                       | PCMHs   | “guided care”:ti,ab,kw OR health next care next home*:ti,ab,kw OR healthcare next home*:ti,ab,kw OR medical next home*:ti,ab,kw OR pcmh:ti,ab,kw OR pcmhs:ti,ab,kw OR “patient aligned”:ti,ab,kw OR primary next care next home*:ti,ab,kw |



|    |                          |                                                                                                                                                                                                                                                                                                                                                                                                                                                                                                                                                                                                                                                                                                                                                                                                                                                                                                                                                                                                                                                                                                                                                                                                                      |
|----|--------------------------|----------------------------------------------------------------------------------------------------------------------------------------------------------------------------------------------------------------------------------------------------------------------------------------------------------------------------------------------------------------------------------------------------------------------------------------------------------------------------------------------------------------------------------------------------------------------------------------------------------------------------------------------------------------------------------------------------------------------------------------------------------------------------------------------------------------------------------------------------------------------------------------------------------------------------------------------------------------------------------------------------------------------------------------------------------------------------------------------------------------------------------------------------------------------------------------------------------------------|
| #2 | Components of PCMHs      | <p>[mh "Case Management"] OR [mh ^"Continuity of Patient Care"] OR [mh "Delivery of Health Care, Integrated"] OR [mh "Disease Management"] OR [mh ^"Patient Care Management"] OR [mh ^"Patient Care Planning"] OR [mh ^"Patient Care Team"] OR [mh "Patient-Centered Care"] OR care next manage*:ti,ab,kw OR "care redesign":ti,ab OR care next team*:ti,ab,kw OR case next manage*:ti,ab,kw OR 'centered care':ti,ab,kw OR centered next health*:ti,ab,kw OR chronic next care next model*:ti,ab,kw OR "collaborative care":ti,ab,kw OR collaboratives:ti,ab,kw OR continuity next/3 care:ti,ab,kw OR disease next manage*:ti,ab,kw OR health next care next team*:ti,ab,kw OR health next team*:ti,ab,kw OR healthcare next team*:ti,ab,kw OR "integrated delivery":ti,ab,kw OR integrated next health*:ti,ab,kw OR inter next disciplinary next team*:ti,ab,kw OR "interdisciplinary care":ti,ab,kw OR interdisciplinary next team*:ti,ab,kw OR "multi disciplinary care":ti,ab,kw OR multi next disciplinary next team*:ti,ab,kw OR "multidisciplinary care":ti,ab,kw OR multidisciplinary next team*:ti,ab,kw OR patient next center*:ti,ab,kw OR "system redesign":ti,ab,kw OR "systems redesign":ti,ab,kw</p> |
| #3 | Settings and Specialties | <p>[mh "Ambulatory Care"] OR [mh ^"Ambulatory Care Facilities"] OR [mh ^"Community Health Centers"] OR [mh ^"Community Health Services"] OR [mh "Community Medicine"] OR [mh "Community Networks"] OR [mh "Family Practice"] OR [mh "General Practice"] OR [mh "Geriatrics"] OR [mh "Health Care Coalitions"] OR [mh "Health Services for the Aged"] OR [mh "Internal Medicine"] OR [mh ^"Outpatient Clinics, Hospital"] OR [mh "Physicians, Family"] OR [mh "Physicians, Primary Care"] OR [mh ^"Primary Health Care"] OR "ambulatory care":ti,ab,kw OR "community medicine":ti,ab,kw OR family next physician*:ti,ab,kw OR family next pract*:ti,ab,kw OR general next clinical next pract*:ti,ab,kw OR general next medical next pract*:ti,ab,kw OR "general medicine":ti,ab,kw OR general next physician*:ti,ab,kw OR general next pract*:ti,ab,kw OR geriatric:ti,ab,kw OR geriatrician*:ti,ab,kw OR geriatrics:ti,ab,kw OR gp:ti,ab,kw OR gps:ti,ab,kw OR "internal medicine":ti,ab,kw OR internist*:ti,ab,kw OR pcp:ti,ab,kw OR pcps:ti,ab,kw OR "primary care":ti,ab,kw OR "primary health":ti,ab,kw OR primary medical care:ti,ab,kw OR primary next pract*:ti,ab,kw</p>                                    |
| #4 | Diseases and Conditions  | <p>[mh ^"Angina Pectoris"] OR [mh "Anxiety"] OR [mh "Anxiety Disorders"] OR [mh ^"Asthma"] OR [mh ^"Cardiovascular Diseases"] OR [mh "Chronic Disease"] OR [mh "Coronary Disease"] OR [mh "Depression"] OR [mh "Depressive Disorder"] OR [mh "Diabetes Mellitus"] OR [mh "Heart Failure"] OR [mh "Hyperlipidemias"] OR [mh ^"Hypertension"] OR [mh "Low Back Pain"] OR [mh ^"Obesity"] OR [mh "Obesity Hypoventilation Syndrome"] OR [mh "Obesity, Abdominal"] OR [mh "Obesity, Metabolically Benign"] OR</p>                                                                                                                                                                                                                                                                                                                                                                                                                                                                                                                                                                                                                                                                                                        |

|    |                                                                                                                              |                                                                                                                                                                                                                                                                                                                                                                                                                                                                                                                                                                                                                                                                                                                                                                                                                                                                                                                                                                                                                                                         |
|----|------------------------------------------------------------------------------------------------------------------------------|---------------------------------------------------------------------------------------------------------------------------------------------------------------------------------------------------------------------------------------------------------------------------------------------------------------------------------------------------------------------------------------------------------------------------------------------------------------------------------------------------------------------------------------------------------------------------------------------------------------------------------------------------------------------------------------------------------------------------------------------------------------------------------------------------------------------------------------------------------------------------------------------------------------------------------------------------------------------------------------------------------------------------------------------------------|
|    |                                                                                                                              | [mh "Obesity, Morbid"] OR [mh "Overweight"] OR angina:ti,ab,kw OR asthma:ti,ab,kw OR anxiety:ti,ab,kw OR back next pain*:ti,ab,kw OR backach*:ti,ab,kw OR cardiovascular next dis*:ti OR chronic next disease*:ti,ab,kw OR chronic next disorder*:ti,ab,kw OR chronic next illness*:ti,ab,kw OR "chronically ill":ti,ab,kw OR coronary next disease*:ti,ab,kw OR coronary next heart next disease*:ti,ab,kw OR depress*:ti,ab,kw OR diabet*:ti,ab,kw OR heart next failure*:ti,ab,kw OR hyperlipidaem*:ti,ab,kw OR hyperlipidem*:ti,ab,kw OR hypertens*:ti,ab,kw OR obese:ti,ab,kw OR obesity:ti,ab,kw                                                                                                                                                                                                                                                                                                                                                                                                                                                  |
| #5 |                                                                                                                              | #2 AND #3 AND #4                                                                                                                                                                                                                                                                                                                                                                                                                                                                                                                                                                                                                                                                                                                                                                                                                                                                                                                                                                                                                                        |
| #6 | Components of PCMHs<br><br>focused search restricting<br>Mesh terms to major topic and keywords in the title field only      | [mh "Case Management"] OR [mh ^"Continuity of Patient Care"] OR [mh "Delivery of Health Care, Integrated"] OR [mh "Disease Management"] OR [mh ^"Patient Care Management"] OR [mh ^"Patient Care Planning"] OR [mh ^"Patient Care Team"] OR [mh "Patient-Centered Care"] OR care next manage*:ti OR "care redesign":ti,ab OR care next team*:ti OR case next manage*:ti OR 'centered care':ti OR centered next health*:ti OR chronic next care next model*:ti OR "collaborative care":ti OR collaboratives:ti OR continuity next/3 care:ti OR disease next manage*:ti OR health next care next team*:ti OR health next team*:ti OR healthcare next team*:ti OR "integrated delivery":ti OR integrated next health*:ti OR inter next disciplinary next team*:ti OR "interdisciplinary care":ti OR interdisciplinary next team*:ti OR "multi disciplinary care":ti OR multi next disciplinary next team*:ti OR "multidisciplinary care":ti OR multidisciplinary next team*:ti OR patient next center*:ti OR "system redesign":ti OR "systems redesign":ti |
| #7 | Settings and Specialties<br><br>focused search restricting<br>Mesh terms to major topic and keywords in the title field only | [mh "Ambulatory Care"] OR [mh ^"Ambulatory Care Facilities"] OR [mh ^"Community Health Centers"] OR [mh ^"Community Health Services"] OR [mh "Community Medicine"] OR [mh "Community Networks"] OR [mh "Family Practice"] OR [mh "General Practice"] OR [mh "Geriatrics"] OR [mh "Health Care Coalitions"] OR [mh "Health Services for the Aged"] OR [mh "Internal Medicine"] OR [mh ^"Outpatient Clinics, Hospital"] OR [mh "Physicians, Family"] OR [mh "Physicians, Primary Care"] OR [mh ^"Primary Health Care"] OR "ambulatory care":ti OR "community medicine":ti OR family next physician*:ti OR family next pract*:ti OR general next clinical next pract*:ti OR general next medical next pract*:ti OR "general medicine":ti OR general next physician*:ti OR general next pract*:ti OR geriatric:ti OR geriatrician*:ti OR geriatrics:ti OR gp:ti OR gps:ti OR "internal medicine":ti OR internist*:ti OR pcp:ti OR pcps:ti OR "primary care":ti OR "primary health":ti OR primary medical care:ti OR primary next pract*:ti                  |
| #8 |                                                                                                                              | #6 AND #7                                                                                                                                                                                                                                                                                                                                                                                                                                                                                                                                                                                                                                                                                                                                                                                                                                                                                                                                                                                                                                               |
| #9 |                                                                                                                              | #1 OR #5 OR #9                                                                                                                                                                                                                                                                                                                                                                                                                                                                                                                                                                                                                                                                                                                                                                                                                                                                                                                                                                                                                                          |

|     |                                  |                          |
|-----|----------------------------------|--------------------------|
| #10 | Publication date limit 2004-2017 | Limit #9 to 2014 to 2017 |
|-----|----------------------------------|--------------------------|

**Appendix 3: List of Integrated Delivery and Finance Systems and Associated Insurance Products**

| Parent Organization       | State | Plan Name                                     |
|---------------------------|-------|-----------------------------------------------|
| VA                        | USA   | VA                                            |
| AHMC Central Health LLC   | CA    | 'CENTRAL HEALTH PLAN OF CALIFORNIA, INC. AHMC |
| Aultman Health Foundation | OH    | 'AULTCARE HEALTH INSURING CORPORATION         |

|                                                           |    |                                                            |
|-----------------------------------------------------------|----|------------------------------------------------------------|
| <b>Baylor Scott &amp; White Holdings</b>                  | TX | 'SCOTT AND WHITE HEALTH PLAN                               |
| <b>Baylor Scott &amp; White Holdings</b>                  | TX | 'INSURANCE COMPANY OF SCOTT AND WHITE                      |
| <b>Capital District Physicians' Health Plan, Inc.</b>     | NY | 'CDPHP UNIVERSAL BENEFITS, INC.                            |
| <b>Capital District Physicians' Health Plan, Inc.</b>     | NY | 'CAPITAL DISTRICT PHYSICIANS' HEALTH PLAN, INC.            |
| <b>Catholic Health Initiatives</b>                        | WA | 'SOUNDPATH HEALTH CHI                                      |
| <b>Catholic Health Initiatives</b>                        | AR | 'QUALCHOICE ADVANTAGE CHI                                  |
| <b>Catholic Health Initiatives</b>                        | NE | 'HEARTLANDPLAINS HEALTH Catholic Health Initiatives        |
| <b>Catholic Health Initiatives</b>                        | OH | RIVERLINK HEALTH CHI                                       |
| <b>CommunityCare Managed Healthcare Plans of OK, Inc.</b> | OK | 'COMMUNITY CARE HMO, INC                                   |
| <b>Essence Group Holdings Corporation</b>                 | MO | 'ESSENCE HEALTHCARE, INC.                                  |
| <b>Geisinger Health System</b>                            | PA | 'GEISINGER HEALTH PLAN                                     |
| <b>Geisinger Health System</b>                            | PA | 'GEISINGER INDEMNITY INSURANCE COMPANY                     |
| <b>Geisinger Health System</b>                            | PA | 'GEISINGER QUALITY OPTIONS, INC.                           |
| <b>Group Health Cooperative</b>                           | WA | 'GROUP HEALTH COOPERATIVE                                  |
| <b>Health First, Inc.</b>                                 | FL | HEALTH FIRST HEALTH PLANS                                  |
| <b>Health First, Inc.</b>                                 | FL | 'HEALTH FIRST HEALTH PLANS                                 |
| <b>Healthfirst, Inc.</b>                                  | NY | 'HEALTHFIRST HEALTH PLAN, INC.                             |
| <b>Healthfirst, Inc.</b>                                  | NY | 'HEALTHFIRST HEALTH PLAN, INC.                             |
| <b>HealthPartners, Inc.</b>                               | MN | 'GROUP HEALTH PLAN, INC. (Health Partners Inc)             |
| <b>HealthPartners, Inc.</b>                               | MN | 'HEALTHPARTNERS, INC.                                      |
| <b>Henry Ford Health System</b>                           | MI | 'HAP MIDWEST HEALTH PLAN, INC.                             |
| <b>Henry Ford Health System</b>                           | MI | 'HEALTH ALLIANCE PLAN OF MICHIGAN                          |
| <b>Henry Ford Health System</b>                           | MI | 'ALLIANCE HEALTH AND LIFE INSURANCE COMPANY                |
| <b>Henry Ford Health System</b>                           | MI | 'HAP MIDWEST HEALTH PLAN, INC.                             |
| <b>InnovaCare Inc.</b>                                    | PR | 'MMM HEALTHCARE, LLC Innovacare                            |
| <b>InnovaCare Inc.</b>                                    | PR | 'MMM HEALTHCARE, LLC Innovacare                            |
| <b>InnovaCare Inc.</b>                                    | PR | 'MMM HEALTHCARE, LLC Innovacare                            |
| <b>Intermountain Health Care, Inc.</b>                    | UT | 'SELECTHEALTH, INC. Intermountain                          |
| <b>Kaiser Foundation Health Plan, Inc.</b>                | CO | 'KAISER FOUNDATION HP OF CO                                |
| <b>Kaiser Foundation Health Plan, Inc.</b>                | OR | 'KAISER FOUNDATION HP OF THE N W                           |
| <b>Kaiser Foundation Health Plan, Inc.</b>                | CA | 'KAISER FOUNDATION HP, INC.                                |
| <b>Kaiser Foundation Health Plan, Inc.</b>                | CA | KAISER FOUNDATION HP, INC.                                 |
| <b>Kaiser Foundation Health Plan, Inc.</b>                | MD | 'KAISER FNDN HP OF THE MID-ATLANTIC STS                    |
| <b>Kaiser Foundation Health Plan, Inc.</b>                | HI | 'KAISER FOUNDATION HP, INC.                                |
| <b>Kaiser Foundation Health Plan, Inc.</b>                | GA | 'KAISER FOUNDATION HP OF GA, INC.                          |
| <b>Kelsey-Seybold Medical Group, PLLC</b>                 | TX | 'KS PLAN ADMINISTRATORS, LLC                               |
| <b>Marshfield Clinic Health System, Inc.</b>              | WI | 'SECURITY HEALTH PLAN OF WISCONSIN, INC. Marshfield Clinic |

|                                         |    |                                                |
|-----------------------------------------|----|------------------------------------------------|
| <b>Martin's Point Health Care, Inc.</b> | ME | 'MARTIN'S POINT GENERATIONS ADVANTAGE, INC.    |
| <b>Martin's Point Health Care, Inc.</b> | ME | 'MARTIN'S POINT GENERATIONS ADVANTAGE, INC.    |
| <b>Ministry Health Care, Inc.</b>       | WI | NETWORK HEALTH INSURANCE CORPORATION           |
| <b>Presbyterian Healthcare Services</b> | NM | 'PRESBYTERIAN INSURANCE COMPANY, INC.          |
| <b>Presbyterian Healthcare Services</b> | NM | 'PRESBYTERIAN HEALTH PLAN                      |
| <b>Providence Health &amp; Services</b> | OR | 'PROVIDENCE HEALTH ASSURANCE                   |
| <b>Spectrum Health System</b>           | MI | 'PRIORITY HEALTH Spectrum                      |
| <b>SSM Healthcare Corporation</b>       | WI | 'DEAN HEALTH PLAN, INC.                        |
| <b>SSM Healthcare Corporation</b>       | WI | 'DEAN HEALTH PLAN, INC.                        |
| <b>Summa Health System</b>              | OH | 'SUMMACARE INC.                                |
| <b>The Carle Foundation</b>             | IL | 'HEALTH ALLIANCE - MIDWEST, INC.               |
| <b>The Carle Foundation</b>             | WA | 'HEALTH ALLIANCE NORTHWEST HEALTH PLAN, INC.   |
| <b>The Carle Foundation</b>             | IL | 'HEALTH ALLIANCE - MIDWEST, INC.               |
| <b>The Carle Foundation</b>             | IL | 'HEALTH ALLIANCE CONNECT, INC.                 |
| <b>Trinity Health</b>                   | OH | 'MOUNT CARMEL HEALTH INSURANCE COMPANY Trinity |
| <b>Trinity Health</b>                   | OH | 'MOUNT CARMEL HEALTH PLAN, INC. Trinity        |
| <b>Tufts Associated HMO, Inc.</b>       | MA | Tufts Associated HMO, Inc.                     |
| <b>Tufts Associated HMO, Inc.</b>       | MA | Tufts Associated HMO, Inc.                     |
| <b>UAB Health System</b>                | AL | VIVA HEALTH, INC.                              |
| <b>UPMC Health System</b>               | PA | 'UPMC FOR YOU, INC                             |
| <b>UPMC Health System</b>               | PA | 'UPMC HEALTH NETWORK, INC.                     |
| <b>UPMC Health System</b>               | PA | 'UPMC HEALTH PLAN, INC.                        |

26

27

28

29

30

31

32 **Appendix 4: Characteristics of Included Studies - Integrated Delivery and Finance Systems (IDFS)**

**Appendix Table 4. Characteristics of Included Studies within Integrated Delivery and Finance Systems (IDFS)**

| <i>Study, Year (Reference)</i> | <i>Location, Organization</i> | <i>Study Type</i> | <i>Population</i> | <i>Follow-up duration</i> | <i>Outcomes reported</i> | <i>Quality</i> |
|--------------------------------|-------------------------------|-------------------|-------------------|---------------------------|--------------------------|----------------|
|--------------------------------|-------------------------------|-------------------|-------------------|---------------------------|--------------------------|----------------|

|                                          |                                    |                                  |                              |              |                                             |      |
|------------------------------------------|------------------------------------|----------------------------------|------------------------------|--------------|---------------------------------------------|------|
| <b>Reuss-Brennan B. et al, 2016 (12)</b> | UT and Idaho, Intermountain Health | Quasi-experimental               | Adults                       | 36+ months   | Utilization, economic, processes of care    | Good |
| <b>Green B. et al, 2016 (50)</b>         | WA, Group Health                   | RCT                              | Adults                       | 12-23 months | Processes of care                           | Good |
| <b>Maeng D. et al, 2015 (35)</b>         | PA, Geisinger                      | Retrospective cohort             | Older Adults                 | 36+ months   | Economic                                    | Good |
| <b>Liss D. et al, 2014 (44)</b>          | WA, Group Health                   | Pre-test/post-test               | Adults                       | 36+ months   | Utilization                                 | Good |
| <b>Graham J. et al, 2015 (45)</b>        | PA, Geisinger                      | Cohort                           | Adults                       | 12-23 months | Utilization, economic, clinical             | Fair |
| <b>Liss D. et al, 2013 (36)</b>          | WA, Group Health                   | Pre-test/post-test               | Adults with DM, HTN, and CAD | 24-35 months | Clinical, processes of care                 | Fair |
| <b>Reid, R et al, 2013 (13)</b>          | WA, Group Health                   | Interrupted time series analysis | Adults                       | 36+ months   | Utilization                                 | Fair |
| <b>Maeng D. et al, 2013 (58)</b>         | PA, Geisinger                      | Cohort                           | Adults                       | 36+ months   | Patient satisfaction                        | Fair |
| <b>Rosenberg C. et al, 2012 (14)</b>     | PA, UPMC                           | Quasi-experimental               | Adults                       | 24-35 months | Utilization economic,                       | Fair |
| <b>Katon W. et al, 2012 (43)</b>         | WA, Group Health                   | RCT                              | Adults                       | 24-35 months | Economic, clinical                          | Good |
| <b>Maeng D. et al 2012 (36)</b>          | PA, Geisinger                      | Retrospective cohort             | Older Adults                 | 36+ months   | Economic                                    | Good |
| <b>Fishman P. et al, 2012 (15)</b>       | WA, Group Health                   | Pre-test/post-test               | Older Adults                 | 36+ months   | Utilization, economic, patient satisfaction | Fair |
| <b>Maeng D. et al 2012 (42)</b>          | PA, Geisinger                      | Retrospective cohort             | Adults                       | 36+ months   | Clinical                                    | Good |
| <b>Gilfillan R. et al, 2010 (16)</b>     | PA, Geisinger                      | Retrospective cohort             | Adults*                      | 36+ months   | Economic, processes of care                 | Good |
| <b>Reid, R et al, 2009 (17)</b>          | WA, Group Health                   | Quasi-experimental               | Adults                       | 12-23 months | Utilization, economic,                      | Fair |

33 \*Pediatric patients included in study but not included in analysis

34  
35  
36  
37  
38  
39  
40  
41  
42  
43  
44  
45  
46  
47  
48  
49  
50  
51

52 **Appendix 5: Characteristics of Included Studies - Government Systems**

| <b>Appendix Table 5. Characteristics of Included Studies within Government Systems</b> |                                   |                   |                   |                               |                              |                |
|----------------------------------------------------------------------------------------|-----------------------------------|-------------------|-------------------|-------------------------------|------------------------------|----------------|
| <i>Study, Year<br/>(Reference)</i>                                                     | <i>Location,<br/>Organization</i> | <i>Study Type</i> | <i>Population</i> | <i>Follow-up<br/>duration</i> | <i>Outcomes<br/>reported</i> | <i>Quality</i> |

|                                     |                             |                                         |                                           |              |                                 |      |
|-------------------------------------|-----------------------------|-----------------------------------------|-------------------------------------------|--------------|---------------------------------|------|
| <b>Edwards S. et al, 2017 (73)</b>  | USA, VA                     | Quasi-experimental                      | Older adult Veterans with diabetes        | 36+ months   | Utilization                     | Good |
| <b>Wong E. et al, 2016 (74)</b>     | USA, VA                     | Retrospective pre-test/post-test        | Adult Veterans                            | 36+ months   | Utilization                     | Good |
| <b>Schubert C. et al, 2016 (38)</b> | IN, VA                      | Prospective quasi-experimental          | Older Veterans                            | 13-23 months | Utilization, Economic           | Good |
| <b>O'Toole T. et al, 2016 (18)</b>  | USA, VA                     | Cohort                                  | Adult Veterans                            | 24-35 months | Utilization                     | Fair |
| <b>Yoon J. et al, 2016 (33)</b>     | USA, VA                     | Cohort                                  | Adult Veterans                            | 36+ months   | Utilization, economic, clinical | Good |
| <b>Andrews C. et al, 2015 (19)</b>  | USA, Military Health System | Pre-test/post-test                      | Adults in military                        | 36+ months   | Utilization, clinical           | Good |
| <b>Yoon J. et al, 2015 (67)</b>     | USA, VA                     | Retrospective pre-test/post-test cohort | Adult Veterans                            | 24-35 months | Utilization, economic           | Good |
| <b>Bekelman D. et al, 2015 (46)</b> | USA, VA                     | RCT                                     | Adult Veterans                            | 12-23 months | Utilization, clinical           | Good |
| <b>Randall I. et al, 2017 (29)</b>  | USA, VA                     | Retrospective pre-test/post-test cohort | Adult Veterans                            | 36+ months   | Utilization                     | Fair |
| <b>Fandre M. et al, 2014 (20)</b>   | KY, Military Health System  | Retrospective cohort                    | Adults, non-active duty Army              | 6-11 months  | Utilization                     | Fair |
| <b>Smith J. et al, 2014 (21)</b>    | AK, Indian Health System    | Pre-test/post-test                      | Adults with Indian Health System benefits | 36+ months   | Utilization, processes of care  | Fair |
| <b>Hebert P. et al, 2014 (37)</b>   | USA, VA                     | Pre-test/post-test                      | Adult Veterans                            | 36+ months   | Utilization, economic           | Good |



|                                        |                            |                      |                                           |              |                                          |      |
|----------------------------------------|----------------------------|----------------------|-------------------------------------------|--------------|------------------------------------------|------|
| <b>Werner R. et al, 2014 (9)</b>       | USA, VA                    | Pre-test/post-test   | Adult Veterans                            | 24-35 months | Utilization, processes of care           | Good |
| <b>Johnston J. et al, 2013 (22)</b>    | AK, Indian Health Services | Prospective cohort   | Adults with Indian Health System benefits | 36+ months   | Utilization                              | Fair |
| <b>Yoon J. et al, 2013 (75)</b>        | USA, VA                    | Quasi-experimental   | Adult Veterans                            | 12-23 months | Utilization                              | Fair |
| <b>Christensen E. et al, 2013 (59)</b> | MD, Military Health System | Quasi-experimental   | Adults in military                        | 36+ months   | Patient satisfaction                     | Good |
| <b>O'Toole T. et al, 2011 (47)</b>     | USA, VA                    | Quasi-experimental   | Adult Veterans                            | 24-35 months | Utilization, clinical                    | Fair |
| <b>O'Toole T. et al, 2010 (30)</b>     | RI, VA                     | Retrospective cohort | Adult Veterans, predominantly homeless    | 12-23 months | Utilization, clinical, processes of care | Good |
| <b>Edes T. et al, 2014 (31)</b>        | USA, VA*                   | Cohort               | Adult Veterans                            | 12-23 months | Utilization, economic                    | Fair |

53 \*Included VA and Medicare admissions

54

55

56

57

58

59

60

61

62 **Appendix 6: Characteristics of Included Studies - Non-Integrated Systems**

| <b>Appendix Table 6. Characteristics of Included Studies within Non-Integrated Delivery Systems</b> |                               |                   |                   |                           |                          |                |
|-----------------------------------------------------------------------------------------------------|-------------------------------|-------------------|-------------------|---------------------------|--------------------------|----------------|
| <i>Study, Year (Reference)</i>                                                                      | <i>Location, Organization</i> | <i>Study Type</i> | <i>Population</i> | <i>Follow-up duration</i> | <i>Outcomes reported</i> | <i>Quality</i> |

|                                      |                                                                              |                                         |                                           |                    |                                          |      |
|--------------------------------------|------------------------------------------------------------------------------|-----------------------------------------|-------------------------------------------|--------------------|------------------------------------------|------|
| <b>Newman R. et al, 2017. (23)</b>   | Eastern Virginia Medical School, VA                                          | Prospective pre-post study              | Adults                                    | 24-35 months       | Utilization                              | Fair |
| <b>Cuellar A. et al, 2016 (24)</b>   | CareFirst BlueCross BlueShield's PCMH, Maryland, Washington DC, and Virginia | Retrospective quasi-experimental cohort | Adults                                    | 36+ months         | Utilization, economic                    | Fair |
| <b>Eisenstat S. et al, 2017 (49)</b> | Massachusetts General Hospital Primary Care Clinics; MA                      | Pre-test/post-test cohort               | Adults                                    | 24-35 months       | Clinical                                 | Good |
| <b>Shane D. et al, 2016 (39)</b>     | Iowa Medicaid Health Homes, IA                                               | Quasi-experimental pre/post             | Adults                                    | 12-23 months       | Utilization, economic                    | Good |
| <b>Kern L. et al, 2016 (34)</b>      | Taconic Health Information Network and Community (THINC), NY                 | Retrospective cohort                    | Adults                                    | 36+ months         | Utilization, processes of care           | Good |
| <b>Domino M. et al, 2016 (76)</b>    | Community Care North Carolina, NC                                            | Quasi-experimental                      | Adults                                    | Less than 6 months | Utilization                              | Good |
| <b>Rosenthal M. et al, 2016 (51)</b> | Health Improvement Collaborate of Greater Cincinnati, OH                     | Cohort                                  | Adults                                    | 24-35 months       | Utilization, economic, processes of care | Good |
| <b>Rosenthal M. et al, 2015 (52)</b> | Rochester Medical Home Initiative, NY                                        | Cohort                                  | Adults                                    | 36+ months         | Utilization, economic, processes of care | Good |
| <b>Rosenthal M. et al, 2016 (25)</b> | Health TeamWork and Cover Colorado, CO                                       | Retrospective pre-test/post-test cohort | Adults                                    | 36+ months         | Utilization, economic, processes of care | Good |
| <b>Jones C. et al, 2016 (40)</b>     | Vermont's all payer medical home; VT                                         | Retrospective cohort                    | Adults, children (excluded from analysis) | 36+ months         | Utilization, economic                    | Good |
| <b>Farrell T. et al, 2015 (77)</b>   | University of Utah Community Clinics, UT                                     | Retrospective pre/post cohort           | Adults                                    | 6-11 months        | Utilization                              | Good |

|                                      |                                                                |                                         |                              |               |                                          |      |
|--------------------------------------|----------------------------------------------------------------|-----------------------------------------|------------------------------|---------------|------------------------------------------|------|
| <b>Romanelli R. et al, 2015 (32)</b> | Davis Family Clinic - Sutter Medical Foundation, CA            | Retrospective cohort                    | Adults                       | 6-11 months   | Utilization, clinical                    | Good |
| <b>Markovitz A. et al, 2015 (78)</b> | University of Michigan, MI                                     | Pre-test/post-test                      | Adults                       | 36+ months    | Processes of care                        | Good |
| <b>Page T. et al, 2015 (53)</b>      | Health Choice Network of Florida (FQHC), FL                    | Retrospective pre-test/post-test cohort | Adults with diabetes         | 12-23 months  | Utilization, processes of care           | Fair |
| <b>Carrillo J. et al, 2014 (26)</b>  | NY Presbyterian / Columbia - Regional Health Collaborative, NY | Pre-test/post-test                      | Adults                       | 36+ months    | Utilization, economic                    | Good |
| <b>Higgins S. et al, 2014 (79)</b>   | Pennsylvania Chronic Care Initiative, PA                       | Longitudinal case control               | Adults                       | 36+ months    | Utilization, economic                    | Good |
| <b>Heyworth L. et al, 2014 (61)</b>  | Harvard Vanguard Medical Associates, MA                        | Pre-test/post-test                      | Adults                       | 36+ months    | Patient satisfaction                     | Fair |
| <b>Fillmore H. et al, 2014 (41)</b>  | Community Care of North Carolina, NC                           | Quasi-experimental                      | Adults                       | 36+ months    | Economic                                 | Fair |
| <b>Rosenthal M. et al, 2013 (54)</b> | Rhode Island Chronic Care Sustainability Initiative, RI        | Quasi-experimental pre/post cohort      | Adults                       | 24-35 months  | Utilization, processes of care           | Good |
| <b>Hochman M. et al, 2014 (62)</b>   | University of Southern California Medical Center, CA           | Pre-test/post-test                      | Adults                       | 12-23 months  | Utilization, patient satisfaction        | Good |
| <b>Werner R. et al, 2013 (55)</b>    | Horizon Blue Cross Blue Shield of New Jersey, NJ               | Pre-test/post-test                      | Adults                       | 24-35 months  | Utilization, economic, processes of care | Good |
| <b>Fifield J. et al, 2013 (56)</b>   | Emblem Health Inc., NY                                         | RCT                                     | Adults                       | 12-23 months  | Utilization, economic, processes of care | Good |
| <b>Schmidt L. et al, 2013 (60)</b>   | Safety net clinics in Orleans Parish, New Orleans LA           | Pre-test/post-test                      | Adults in safety net clinics | Not specified | Patient Satisfaction                     | Poor |

|                                       |                                                       |                    |                                         |              |             |      |
|---------------------------------------|-------------------------------------------------------|--------------------|-----------------------------------------|--------------|-------------|------|
| <b>Isetts B. et al, 2012 (80)</b>     | Fairview Health Services of Minneapolis, MN           | Pre-test/post-test | Adults                                  | 12-23 months | Economic    | Fair |
| <b>Carrillo J. et al, 2011 (27)</b>   | NY Presby Regional Health Collaborative, NY           | Pre-test/post-test | Hispanic adults with DM, asthma, or CHF | 6-11 months  | Utilization | Fair |
| <b>Gabbay R. et al. 2011 (57)</b>     | Pennsylvania Governor's Office Health Care Reform, PA | Quasi-experimental | Adults                                  | 12-23 months | Processes   | Fair |
| <b>Lee K. et al, 2011 (81)</b>        | Jacksonville Urban Disparity Institute, FL            | Retrospective      | Adults                                  | 36+ months   | Clinical    | Good |
| <b>Roby D. et al, 2010 (28)</b>       | Orange County Health Care Coverage Institute, FL      | Retrospective      | Adults                                  | 36+ months   | Utilization | Good |
| <b>Hassaballa I. et al, 2015 (48)</b> | Whittier Street Health Center, MA                     | Pre-test/post-test | Adults                                  | 24-35 months | Clinical    | Fair |
| <b>White B. et al, 2014 (82)</b>      | Oregon Health and Science University, OR              | Retrospective      | Adults                                  | 12-23 months | Utilization | Good |

63

64

65

66

67

68

69

### Appendix 7: Text Depiction of Flow Diagram

Records # breakdown after EndNote deduping

Total number of records      **13938** (5921 duplicate records removed from **19859**)

|                                                                                        |                |
|----------------------------------------------------------------------------------------|----------------|
| PubMed                                                                                 | 6738           |
| Embase.com                                                                             | 5534           |
| Cochrane Library Databases                                                             | 1666           |
| CDSR (Cochrane Database of Systematic Reviews): Issue 3 of 12, March 2017              | Records = 189  |
| DARE (Database of Abstracts of Reviews of Effect): Issue 2 of 4, April 2015            | Records = 121  |
| CENTRAL (Cochrane Central Register of Controlled Trials): Issue 2 of 12, February 2017 | Records = 1213 |
| Cochrane Methodology Register: Issue 3 of 4, July 2012                                 | Records = 3    |
| HTAD (Health Technology Assessment Database): Issue 4 of 4, October 2016               | Records = 45   |
| NHSEED (NHS Economic Evaluation Database): Issue 2 of 4, April 2015                    | Records = 95   |

Record # breakdown before EndNote deduping:

|                                                                                        |                |
|----------------------------------------------------------------------------------------|----------------|
| Total number of records                                                                | <b>19859</b>   |
| PubMed                                                                                 | 6761           |
| Embase.com                                                                             | 9923           |
| Cochrane Library Databases                                                             | 3175           |
| CDSR (Cochrane Database of Systematic Reviews): Issue 3 of 12, March 2017              | Records = 208  |
| DARE (Database of Abstracts of Reviews of Effect): Issue 2 of 4, April 2015            | Records = 134  |
| CENTRAL (Cochrane Central Register of Controlled Trials): Issue 2 of 12, February 2017 | Records = 2649 |
| Cochrane Methodology Register: Issue 3 of 4, July 2012                                 | Records = 7    |
| HTAD (Health Technology Assessment Database): Issue 4 of 4, October 2016               | Records = 51   |
| NHSEED (NHS Economic Evaluation Database): Issue 2 of 4, April 2015                    | Records = 126  |

## Appendix 8: Screening Questions by Level

1) Does the study fit any of the criteria (see below) for the patient centered medical home?

A Team based care. B) An intervention that includes any of the following: enhanced access to care

- coordinated care
- comprehensive healthcare delivery
- systems based approach to improving quality and safety

A sustained partnership and personal relationship over time that is patient centered

Reorganization and structural changes to the traditional practice of healthcare delivery in a primary care setting

2) Does the study involve adults in an internal medicine (inpatient/outpatient), family practice, or geriatrics setting? Please indicate no for surgical or pediatric articles.

3) Is the study based in the US?

4) Is the study a randomized control trial or observational study?

5) Is the study one of the following? A) Editorial B) Conference Abstract C) Review Article

6. Is the publication date from 2004-2017?

Level 2:

1. Was the majority of the study conducted in the outpatient, primary care (internal medicine, family medicine, or geriatrics) setting?
2. Did the study intervention include only telehealth or electronic health record (EHR/EMR) intervention?
3. Did the study address patient or population outcomes?
4. Is the study based in the US?
5. Does data collection end prior to the year 2004?
6. Is this a systematic review, commentary, meta-analysis, or qualitative study?

70 Appendix 9: All Included Studies and Outcomes

| <i>Study, Year<br/>(Reference)</i>                                                               | <i>Location,<br/>Organization<br/><br/>Population<br/><br/>Payer and<br/>payment mix<br/>(when available)</i>     | <i>Study Type<br/><br/>Follow-up<br/>duration</i> | <i>Quality</i> | <i>Outcome Category</i>                                       | <i>Outcome</i>                                                                               | <i>Reported Outcome<br/>Changes</i> |
|--------------------------------------------------------------------------------------------------|-------------------------------------------------------------------------------------------------------------------|---------------------------------------------------|----------------|---------------------------------------------------------------|----------------------------------------------------------------------------------------------|-------------------------------------|
| <b>Characteristics of Included Studies within Integrated Delivery and Finance Systems (IDFS)</b> |                                                                                                                   |                                                   |                |                                                               |                                                                                              |                                     |
| <b>Reiss-<br/>Brennan B.<br/>et al, 2016<br/>(12)</b>                                            | UT and Idaho,<br>Intermountain<br>Health<br><br>Adults<br><br>Intermountain<br>Health Insurance,<br>mixed payment | Quasi-<br>experimental<br><br>36+ months          | Good           | Processes of care:<br>screening                               | Depression screening rates among<br>patients with depression, PCMH relative<br>to usual care | OR 1.91 (CI 1.75, 2.08,<br>p <.001) |
|                                                                                                  |                                                                                                                   |                                                   |                | Processes of care:<br>adherence to care<br>plan or guidelines | Adherence to diabetes bundle, PCMH<br>relative to usual care                                 | OR 1.21 (CI 1.11 ,1.42,<br>p<.001)  |
|                                                                                                  |                                                                                                                   |                                                   |                | Processes of care:<br>adherence to care<br>plan or guidelines | Documented self-care plan, PCMH<br>relative to usual care                                    | OR 5.59 (CI 4.27, 7.33,<br>p<.001)  |
|                                                                                                  |                                                                                                                   |                                                   |                | Processes of care:<br>adherence to care<br>plan or guidelines | Hypertension in control<br>(<140/90mmHg), PCMH relative to<br>usual care                     | OR 0.87 (CI 0.80, 0.95,<br>p=.002)  |
|                                                                                                  |                                                                                                                   |                                                   |                | Processes of care:<br>adherence to care<br>plan or guidelines | Documented advanced directives, PCMH<br>relative to usual care                               | OR 0.97 (CI .91, 1.03, p<br>.28)    |
|                                                                                                  |                                                                                                                   |                                                   |                | Processes of care:<br>adherence to care<br>plan or guidelines | Annual visit with PCP, PCMH relative to<br>usual care                                        | OR 1.09 (CI 1.03, 1.15,<br>p=.002)  |
|                                                                                                  |                                                                                                                   |                                                   |                | Utilization:<br>admissions                                    | Hospital admissions, PCMH relative to<br>usual care                                          | IRR 0.89 (CI .85, .93,<br>p<.001)   |

|                                  |                                                                   |                                    |      |                                |                                                                                                                    |                                                                        |
|----------------------------------|-------------------------------------------------------------------|------------------------------------|------|--------------------------------|--------------------------------------------------------------------------------------------------------------------|------------------------------------------------------------------------|
|                                  |                                                                   |                                    |      | Utilization: ED visits         | ED visits, PCMH relative to usual care                                                                             | IRR 0.77 (CI .74-.80, p<.001)                                          |
|                                  |                                                                   |                                    |      | Utilization: outpatient visits | Ambulatory sensitive visits, PCMH relative to usual care                                                           | IRR 0.77 (CI .70, .85, p<.001)                                         |
|                                  |                                                                   |                                    |      | Utilization: outpatient visits | PCP visits, PCMH relative to usual care                                                                            | IRR 0.93 (CI .92, .94, p<.001)                                         |
|                                  |                                                                   |                                    |      | Utilization: outpatient visits | Specialty visits, PCMH relative to usual care                                                                      | IRR 0.98 (CI .97, .99, p=.02)                                          |
|                                  |                                                                   |                                    |      | Utilization: outpatient visits | Urgent care visits, PCMH relative to usual care                                                                    | IRR 0.99 (CI .97-1.02, p=.74)                                          |
|                                  |                                                                   |                                    |      | Economic: total cost           | Payments received by health system by insurances, PCMH relative to usual care                                      | \$115.09 decrease; \$3400.62 vs \$3515.71 (p=.008)                     |
| <b>Green B. et al, 2016 (50)</b> | WA, Group Health<br>Adults<br>Group Health Insurance, mixed payer | RCT<br>12-23 months                | Good | Processes of care: screening   | Colorectal cancer screening rate with >8 months of intervention exposure vs <4 months, PCMH relative to usual care | 10.1% increase (CI 5.7%, 14.6%)                                        |
| <b>Maeng D. et al, 2015 (35)</b> | PA, Geisinger<br>Older Adults<br>Geisinger Insurance              | Retrospective cohort<br>36+ months | Good | Economic: total cost           | Adjusted cost estimate of PCMH intervention minus expected cost                                                    | \$53 or 7.9% decrease (CI -\$100, -\$6)                                |
|                                  |                                                                   |                                    |      | Economic: inpatient cost       | Adjusted cost estimate of PCMH intervention minus expected cost                                                    | \$34 or 18.7% decrease (CI -\$60, -\$9)                                |
|                                  |                                                                   |                                    |      | Economic: outpatient cost      | Adjusted cost estimate of PCMH intervention minus expected cost                                                    | \$9 or 5.1% decrease (CI -\$26, \$9)                                   |
|                                  |                                                                   |                                    |      | Economic: professional cost    | Adjusted cost estimate of PCMH intervention minus expected cost                                                    | \$4 or 2.7% decrease (CI -\$15, \$7)                                   |
|                                  |                                                                   |                                    |      | Economic: prescription cost    | Adjusted cost estimate of PCMH intervention minus expected cost                                                    | \$7 or 6.8% decrease (CI -\$18, \$3)                                   |
| <b>Liss D. et al, 2014 (72)</b>  | WA, Group Health<br>Adults                                        | Pre-test/post-test<br>36+ months   | Good | Utilization: outpatient visits | Overall specialty use rate                                                                                         | Year 1: RR 0.93 (p<.001); Year 2: RR 0.96 (p=.02) Year 3: 0.98 (p=.23) |



|                                   |                                                               |                     |      |                                                                                                                     |                                                                          |                                  |
|-----------------------------------|---------------------------------------------------------------|---------------------|------|---------------------------------------------------------------------------------------------------------------------|--------------------------------------------------------------------------|----------------------------------|
|                                   | Group Health Insurance Mix (48.8% commercial, 49.9% Medicare) |                     |      |                                                                                                                     |                                                                          |                                  |
|                                   |                                                               |                     |      | Adjusted RR of specialty care at 2nd year post PCMH implementation listed by specialty, PCMC relative to usual care | Behavioral health                                                        | RR 1.23 (CI 1.14, 1.33, p<.001)  |
|                                   |                                                               |                     |      |                                                                                                                     | Cardiology                                                               | RR 0.99 (CI 0.95, 1.02)          |
|                                   |                                                               |                     |      |                                                                                                                     | Consultative Internal Medicine                                           | RR 0.61 (CI 0.54, 0.68, p<.001)  |
|                                   |                                                               |                     |      |                                                                                                                     | Eye Care                                                                 | RR 1.08 (CI 1.06, 1.11, p<.001)  |
|                                   |                                                               |                     |      |                                                                                                                     | Gastroenterology                                                         | RR 0.86 (CI 0.81, 0.93, p<.001)  |
|                                   |                                                               |                     |      |                                                                                                                     | General Surgery                                                          | RR 1.01 (CI 0.93, 1.10)          |
|                                   |                                                               |                     |      |                                                                                                                     | Neurology                                                                | RR 1.24 (CI 1.13, 1.37, p<.001)  |
|                                   |                                                               |                     |      |                                                                                                                     | Obstetrics/Gynecology                                                    | RR 1.09 (CI .98, 1.21)           |
|                                   |                                                               |                     |      |                                                                                                                     | Orthopedic Surgery                                                       | RR 1.11 (CI 1.05, 1.17, p<.001)  |
|                                   |                                                               |                     |      |                                                                                                                     | Urology                                                                  | RR 1.04 (CI 0.95, 1.13)          |
| <b>Graham J. et al, 2015 (45)</b> | PA, Geisinger Adults Geisinger insurance                      | Cohort 12-23 months | Fair | Health: Mortality                                                                                                   | Deaths at 12 months, PCMH relative to usual care                         | 15% decrease (11% vs 25%, p<.01) |
|                                   |                                                               |                     |      | Health: pain                                                                                                        | Harris Hip pain score (0-91 scale, 91=best), PCMH relative to usual care | 73 vs 64 (p=.04)                 |
|                                   |                                                               |                     |      | Health: quality of life                                                                                             | EQ-5D quality of life scale (0-1, 1=best), PCMH relative to usual care   | 0.76 vs 0.73 (p=.49)             |
|                                   |                                                               |                     |      | Economic: total cost                                                                                                | Mean total cost PMPM, PCMH relative to usual care                        | \$1281 vs \$1496 (p=.52)         |
|                                   |                                                               |                     |      | Economic: pharmacy cost                                                                                             | Mean pharmacy cost PMPM, PCMH relative to usual care                     | \$69 vs 141 (p=.20)              |

|                                 |                                                                     |                                    |      |                                           |                                                                                                  |                                                                  |
|---------------------------------|---------------------------------------------------------------------|------------------------------------|------|-------------------------------------------|--------------------------------------------------------------------------------------------------|------------------------------------------------------------------|
|                                 |                                                                     |                                    |      | Economic: non-pharmacy cost               | Mean non-pharmacy cost, PCMH relative to usual care                                              | \$1212 vs \$1452 (p=.52)                                         |
|                                 |                                                                     |                                    |      | Utilization: ED visits                    | Visits per 100 patients at 12 months, PCMH relative to usual care                                | 69.6 vs 54.3 (p=.42)                                             |
|                                 |                                                                     |                                    |      | Utilization: admissions                   | Admissions per 100 patients at 12 months, PCMH relative to usual care                            | 23.3 vs 25.7 (p=.83)                                             |
|                                 |                                                                     |                                    |      | Utilization: prescriptions                | Prescription orders per patient at 12 months, PCMH relative to usual care                        | 56.2 vs 40.2 (p=.16)                                             |
| <b>Liss D. et al, 2013 (44)</b> | WA, Group Health<br>Adults with DM, HTN, and CAD<br>Insurance mixed | Pre-test/post-test<br>24-35 months | Fair | Clinical: Hgb A1c                         | Adjusted RR of mean Hgb A1c in PCMH cohort relative usual care at 2 year follow up               | 0.15% decrease in Hgb A1c (p<.001)                               |
|                                 |                                                                     |                                    |      | Clinical: Blood pressure (systolic)       | Adjusted RR of mean systolic BP in PCMH cohort relative usual care at 2 year follow up           | 0.2 mmHg decrease in systolic BP (RR -0.43, p>.05)               |
|                                 |                                                                     |                                    |      | Clinical: lipids                          | Adjusted RR of mean LDL in PCMH cohort relative usual care at 2 year follow up                   | 2.4 mg/dL decrease in LDL (RR -2.20, p<.01)                      |
|                                 |                                                                     |                                    |      | Processes of care: Hgb A1c at goal        | Number of patients with Hgb A1c <9.0 in PCMH cohort relative usual care at 2 year follow up      | 4 patient increase (RR 1.03, p<.05)                              |
|                                 |                                                                     |                                    |      | Processes of care: Blood pressure at goal | Number of patients with BP <140/90 in PCMH cohort relative usual care at 2 year follow up        | 1 patient increase (RR 1.01, p>.05)                              |
|                                 |                                                                     |                                    |      | Processes of care: Lipids at goal         | Number of patients with LDL <100 mg/dL in PCMH cohort relative usual care at 2 year follow up    | 9 patient increase (RR 1.11, p<.01)                              |
|                                 |                                                                     |                                    |      | Processes of care: screening              | Number of patients with Hgb A1c screening in PCMH cohort relative usual care at 2 year follow up | 1 patient decrease (RR 1.01, p<.05)                              |
|                                 |                                                                     |                                    |      | Processes of care: screening              | Number of patients with LDL screening in PCMH cohort relative usual care at 2 year follow up     | 1 patient increase (RR 1.00, p>.05)                              |
| <b>Reid, R et al, 2013 (13)</b> | WA, Group Health<br>Adults                                          | Interrupted time series analysis   | Fair | Utilization: outpatient visits            | PCP visits/month; adjusted change in use per 1000 enrollees, PCMH relative to control            | Year 2: 9.65% decrease (p<.001); Year 3 12.62% decrease (p<.001) |

|                                  |                                                                                   |                      |      |                                                                                                   |                                                                                                                 |                                                                  |
|----------------------------------|-----------------------------------------------------------------------------------|----------------------|------|---------------------------------------------------------------------------------------------------|-----------------------------------------------------------------------------------------------------------------|------------------------------------------------------------------|
|                                  | Group Health Insurance Mix (Commercial > Medicare > Medicaid > other)             | 36+ months           |      |                                                                                                   |                                                                                                                 |                                                                  |
|                                  |                                                                                   |                      |      | Utilization: ED visits                                                                            | ED visits/month; adjusted change in use per 1000 enrollees, PCMH relative to control                            | Year 2: 1.73% decrease (p<.001); Year 3: 2.31% decrease (p<.001) |
|                                  |                                                                                   |                      |      | Utilization: admissions                                                                           | Inpatient visits/month; adjusted change in use per 1000 enrollees, PCMH relative to control                     | Year 2: 0.01% decrease (p=.93); Year 3: 0.05% increase (p=.74)   |
|                                  |                                                                                   |                      |      | Utilization: admissions                                                                           | Ambulatory care sensitive admissions/visit: adjusted change in use per 1000 enrollees, PCMH relative to control | Year 2: 0.02% decrease (p=.61); Year 3: 0.03% increase (p=.49)   |
| <b>Maeng D. et al, 2013 (58)</b> | PA, Geisinger Adults<br>Geisinger Insurance Mix (Medicare, Medicaid > Commercial) | Cohort<br>36+ months | Fair | Patient satisfaction:                                                                             | Noticed difference in care                                                                                      | 13.8% increase (p<.05)                                           |
|                                  |                                                                                   |                      |      | Adjusted difference in rates of patient response to survey questions, PCMH relative to usual care | Noticed difference in care coordination                                                                         | 19.6% increase (p<.05)                                           |
|                                  |                                                                                   |                      |      |                                                                                                   | Noticed difference in service                                                                                   | 16.8% increase (p<.05)                                           |
|                                  |                                                                                   |                      |      |                                                                                                   | Feel quality is higher                                                                                          | 10.4% increase (p<.05)                                           |
|                                  |                                                                                   |                      |      |                                                                                                   | Source of care PCP                                                                                              | 15.4% increase (p<.05)                                           |
|                                  |                                                                                   |                      |      |                                                                                                   | Source of care ED                                                                                               | 12.3% decrease (p<.05)                                           |
|                                  |                                                                                   |                      |      |                                                                                                   | Got care on same day                                                                                            | 0.8% decrease (NS)                                               |
|                                  |                                                                                   |                      |      |                                                                                                   | Specialist appointment within 1 week                                                                            | 0.9% decrease (NS)                                               |
|                                  |                                                                                   |                      |      |                                                                                                   | Not difficult to contact via phone                                                                              | 9.7% decrease (NS)                                               |
|                                  |                                                                                   |                      |      |                                                                                                   | Not difficult to contact on weekend/night                                                                       | 0.6% decrease (NS)                                               |
|                                  |                                                                                   |                      |      |                                                                                                   | Got test results in 1 week                                                                                      | 2.5% increase (NS)                                               |
|                                  |                                                                                   |                      |      |                                                                                                   | PCP always listens to concerns                                                                                  | 4.4% increase (NS)                                               |

|                                      |                                                                                     |                                    |      |                           |                                                                         |                                                                        |
|--------------------------------------|-------------------------------------------------------------------------------------|------------------------------------|------|---------------------------|-------------------------------------------------------------------------|------------------------------------------------------------------------|
|                                      |                                                                                     |                                    |      |                           | PCP always explains                                                     | 4.0% increase (NS)                                                     |
|                                      |                                                                                     |                                    |      |                           | PCP always involves patient                                             | 3.4% increase (NS)                                                     |
|                                      |                                                                                     |                                    |      |                           | PCP gives clear instructions                                            | 0.3% decrease (NS)                                                     |
|                                      |                                                                                     |                                    |      |                           | PCP informed about specialist care                                      | 1.2% increase (NS)                                                     |
|                                      |                                                                                     |                                    |      |                           | PCP informed about ED or inpatient care                                 | 1.6% decrease (NS)                                                     |
|                                      |                                                                                     |                                    |      |                           | PCP schedules for preventative services                                 | 1.7% increase (NS)                                                     |
|                                      |                                                                                     |                                    |      |                           | Nurses and receptionists helpful                                        | 0% increase (NS)                                                       |
| <b>Rosenberg C. et al, 2012 (14)</b> | PA, UPMC<br>Adults<br>UPMC Insurance Mix (Commercial > Medicaid > Medicare > Other) | Quasi-experimental<br>24-35 months | Fair | Economic: total cost      | Difference in PMPM costs, PCMH relative to usual care                   | Year 1: \$16.31 increase (p<.0001); Year 2: \$15.84 decrease (p<.0001) |
|                                      |                                                                                     |                                    |      | Economic: medical cost    | Difference in PMPM costs, PCMH relative to usual care                   | Year 1: \$9.41 increase (p<.001); Year 2: \$4.73 decrease (NS)         |
|                                      |                                                                                     |                                    |      | Economic: pharmacy cost   | Difference in PMPM costs, PCMH relative to usual care                   | Year 1: \$6.91 increase (p<.0001); Year 2: \$11.11 decrease (p<.0001)  |
|                                      |                                                                                     |                                    |      | Economic: ED cost         | Difference in PMPM costs, PCMH relative to usual care                   | Year 1: \$0.41 increase (NS); Year 2: \$0.30 decrease (NS)             |
|                                      |                                                                                     |                                    |      | Economic: outpatient cost | Difference in PMPM costs of primary care, PCMH relative to usual care   | Year 1: \$0.46 increase (p<.001); Year 2: \$0.46 increase (p<.01)      |
|                                      |                                                                                     |                                    |      | Economic: outpatient cost | Difference in PMPM costs of specialty care, PCMH relative to usual care | Year 1: \$0.74 increase (p<.01); Year 2: \$0.53 decrease (NS)          |
|                                      |                                                                                     |                                    |      | Economic: laboratory cost | Difference in PMPM costs, PCMH relative to usual care                   | Year 1: \$0.34 increase (p<.001); Year 2: \$0.55 increase (p<.001)     |
|                                      |                                                                                     |                                    |      | Utilization: admissions   | Percent change in use / 1000 members, PCMH relative to usual care       | Year 1: 2.5% decrease (p<.05); Year 2: 4.4% decrease (NS)              |

|                                  |                                                                      |                                    |      |                           |                                                                                                                                        |                                                                                                                                                      |
|----------------------------------|----------------------------------------------------------------------|------------------------------------|------|---------------------------|----------------------------------------------------------------------------------------------------------------------------------------|------------------------------------------------------------------------------------------------------------------------------------------------------|
|                                  |                                                                      |                                    |      | Utilization: readmissions | Percent change in use / 1000 members, PCMH relative to usual care                                                                      | Year 1: 12.9% decrease (p<.05); Year 2: 16.9% decrease (p<.05)                                                                                       |
|                                  |                                                                      |                                    |      | Utilization: ED visits    | Percent change in use / 1000 members, PCMH relative to usual care                                                                      | Year 1: 2.0% decrease (p<.05); Year 2: 3.6% decrease (p<.05)                                                                                         |
| <b>Katon W. et al, 2012 (43)</b> | WA, Group Health<br>Adults<br>Insurance mix not specified            | RCT<br>24-35 months                | Good | Clinical: depression      | SCL-20 score, estimated group difference, PCMH relative to usual care at 12 months                                                     | -0.41% (CI -.56, -.26)                                                                                                                               |
|                                  |                                                                      |                                    |      | Clinical: Hgb A1c         | Hgb A1c%, estimated group difference, PCMH relative to usual care at 12 months                                                         | -0.56% (CI -.85, -.27)                                                                                                                               |
|                                  |                                                                      |                                    |      | Clinical: lipids          | LDL in mg/dL, estimated group difference, PCMH relative to usual care at 12 months                                                     | -9.1 (CI -17.5, -8)                                                                                                                                  |
|                                  |                                                                      |                                    |      | Clinical: blood pressure  | Systolic blood pressure in mmHg, estimated group difference, PCMH relative to usual care at 12 months                                  | -3.4% (CI -6.9, 0.1)                                                                                                                                 |
|                                  |                                                                      |                                    |      | Economic: outpatient cost | Estimated difference in total outpatient costs in primary and secondary sensitivity analysis at 24 months, PCMH relative to usual care | Primary: \$594 decrease (NS); Secondary: \$1116 decrease (NS)                                                                                        |
| <b>Maeng D. et al 2012 (36)</b>  | PA, Geisinger<br>Older Adults<br>Geisinger Insurance (Medicare only) | Retrospective cohort<br>36+ months | Good | Economic: total cost      | Estimated regression cost difference with PMCH exposure by time without prescription drug coverage interaction, in \$PMPM              | Months 1-6: \$24.08 decrease (p<.1); Months 7-12: \$20.58 decrease (NS); Months 13-24: \$33.51 decrease (NS); Month >24: \$59.70 decrease (p<.1)     |
|                                  |                                                                      |                                    |      |                           | Estimated regression cost difference with PMCH exposure by time with prescription drug coverage interaction, in \$PMPM                 | Months 1-6: \$38.11 decrease (p<.1); Months 7-12: \$37.13 decrease (p<.1); Months 13-24: \$62.35 decrease (NS); Month >24: \$108.30 decrease (p<.05) |

|                                    |                              |                               |                                                                                                                                                      |                                                                                                                                                  |                                       |                                                                                                                                                                              |
|------------------------------------|------------------------------|-------------------------------|------------------------------------------------------------------------------------------------------------------------------------------------------|--------------------------------------------------------------------------------------------------------------------------------------------------|---------------------------------------|------------------------------------------------------------------------------------------------------------------------------------------------------------------------------|
| <b>Fishman P. et al, 2012 (15)</b> | WA, Group Health             | Pre-test/post-test            | Fair                                                                                                                                                 | Patient satisfaction: adjusted differences on 100-point scale in responses between patients at PCMH and control clinic, PCMH relative to control | Quality of doctor-patient interaction | 1 year: 1.31 (NS); 2 year: 1.43 (NS)                                                                                                                                         |
|                                    | Older Adults                 | 36+ months                    |                                                                                                                                                      |                                                                                                                                                  | Shared decision making                | 1 year: 4.28 (p<.01); 2 year: 1.58 (NS)                                                                                                                                      |
|                                    | Group Health (Medicare only) |                               |                                                                                                                                                      |                                                                                                                                                  | Coordination of care                  | 1 year: 2.88 (p<.05); 2 year: 3.16 (p<.05)                                                                                                                                   |
|                                    |                              |                               |                                                                                                                                                      |                                                                                                                                                  | Access to care                        | 1 year: 3.78 (p<.001); 2 year: 3.00 (p<.05)                                                                                                                                  |
|                                    |                              |                               |                                                                                                                                                      |                                                                                                                                                  | Helpfulness of staff                  | 1 year: 0.51 (NS); 2 year: 1.03 (NS)                                                                                                                                         |
|                                    |                              |                               |                                                                                                                                                      |                                                                                                                                                  | Patient Activation                    | 1 year: 2.63 (NS); 2 year: 2.38 (NS)                                                                                                                                         |
|                                    |                              |                               |                                                                                                                                                      |                                                                                                                                                  | Goal setting                          | 1 year: 0.74 (NS); 2 year: 3.48 (NS)                                                                                                                                         |
|                                    |                              |                               |                                                                                                                                                      |                                                                                                                                                  | Utilization: admissions               | Ambulatory care sensitive admissions in visits per 1000 patients per month, relative difference in PCMH relative to usual care<br>Year 1: 75% (p<.001); Year 2: 82% (p=.002) |
|                                    |                              |                               |                                                                                                                                                      |                                                                                                                                                  | Utilization: admissions               | Total admissions in visits per 1000 patients per month, relative difference in PCMH relative to usual care<br>Year 1: 98% (p=.625); Year 2: 95% (p=.265)                     |
|                                    |                              |                               |                                                                                                                                                      |                                                                                                                                                  | Utilization: outpatient               | PCP visits per 1000 patients per month, relative difference in PCMH relative to usual care<br>Year 1: 96% (p=.052); Year 2: 93% (p<.001)                                     |
|                                    |                              | Utilization: outpatient       | Specialty visits per 1000 patients per month, relative difference in PCMH relative to usual care<br>Year 1: 108% (p=.001); Year 2: 105% (p=.036)     |                                                                                                                                                  |                                       |                                                                                                                                                                              |
|                                    |                              | Utilization: ED visits        | ED visits per 1000 patients per month, relative difference in PCMH relative to usual care<br>Year 1: 78% (p<.001); Year 2: 79% (p<.001)              |                                                                                                                                                  |                                       |                                                                                                                                                                              |
|                                    |                              | Utilization: telephone visits | Telephone encounters per 1000 patients per month, relative difference in PCMH relative to usual care<br>Year 1: 117% (p<.001); Year 2: 110% (p=.265) |                                                                                                                                                  |                                       |                                                                                                                                                                              |

|                                      |                                                                |                                    |      |                                 |                                                                                                          |                                                                      |
|--------------------------------------|----------------------------------------------------------------|------------------------------------|------|---------------------------------|----------------------------------------------------------------------------------------------------------|----------------------------------------------------------------------|
|                                      |                                                                |                                    |      | Utilization: nursing calls      | Consulting nursing calls per 1000 patients per month, relative difference in PCMH relative to usual care | Year 1: 91% (p=.007); Year 2: 85% (p<.001)                           |
|                                      |                                                                |                                    |      | Utilization: secure messages    | Secure messages per 1000 patients per month, relative difference in PCMH relative to usual care          | Year 1: 208% (p<.001); Year 2: 200% (p=.001)                         |
|                                      |                                                                |                                    |      | Economic: total cost            | Comparison of adjusted costs \$PMPM, PCMH relative to usual care                                         | Year 1: \$2.79 increase (p=.892); Year 2: \$5.92 decrease (p=.781)   |
|                                      |                                                                |                                    |      | Economic: primary care cost     |                                                                                                          | Year 1: \$2.18 increase (p=.112); Year 2: \$1.46 increase (p=.283)   |
|                                      |                                                                |                                    |      | Economic: specialty care        |                                                                                                          | Year 1: \$22.74 increase (p<.001); Year 2: \$18.82 increase (p<.001) |
|                                      |                                                                |                                    |      | Economic: ED cost               |                                                                                                          | Year 1: \$0.76 decrease (p=.537); Year 2: \$1.13 decrease (p=.454)   |
|                                      |                                                                |                                    |      | Economic: inpatient costs       |                                                                                                          | Year 1: \$26.18 decrease (p=.054); Year 2: \$17.08 decrease (p=.261) |
| <b>Maeng D. et al 2012 (42)</b>      | PA, Geisinger<br>Adults<br>Geisinger Insurance (Medicare only) | Retrospective cohort<br>36+ months | Good | Clinical: amputation            | Odds ratio of outcome, PCMH relative to usual care                                                       | OR 0.178 (CI 0.048, 0.664, p<.01)                                    |
|                                      |                                                                |                                    |      | Clinical: new ESRD              | Odds ratio of outcome, PCMH relative to usual care                                                       | OR 0.688 (CI 0.518, 0.915, p<.01)                                    |
|                                      |                                                                |                                    |      | Clinical: Myocardial infarction | Odds ratio of outcome, PCMH relative to usual care                                                       | OR 1.067 (CI 0.993, 1.146, NS)                                       |
|                                      |                                                                |                                    |      | Clinical: CVA                   | Odds ratio of outcome, PCMH relative to usual care                                                       | OR 0.986 (CI 0.946, 1.027, NS)                                       |
| <b>Gilfillan R. et al, 2010 (16)</b> | PA, Geisinger<br>Adults <sup>a</sup>                           | Retrospective cohort<br>36+ months | Good | Process of care: screening      | Proportion of Hgb A1c testing in patients with DM, PCMH relative to usual care                           | 4.37% decrease (p<.01)                                               |

|                                 |                                                                    |                                 |      |                                |                                                                                                               |                                           |
|---------------------------------|--------------------------------------------------------------------|---------------------------------|------|--------------------------------|---------------------------------------------------------------------------------------------------------------|-------------------------------------------|
|                                 | Geisinger Insurance Mix (PPO > HMO > other)                        |                                 |      |                                |                                                                                                               |                                           |
|                                 |                                                                    |                                 |      | Process of care: screening     | Proportion of lipid screening in patients with DM, PCMH relative to usual care                                | 2.04% decrease (p=.103)                   |
|                                 |                                                                    |                                 |      | Process of care: screening     | Proportion of retinopathy screening in patients with DM, PCMH relative to usual care                          | 2.72% decrease (p=.079)                   |
|                                 |                                                                    |                                 |      | Process of care: screening     | Proportion of patients with DM needing medical treatment for nephropathy, PCMH relative to usual care         | 3.15% decrease (p=.011)                   |
|                                 |                                                                    |                                 |      | Process of care: screening     | Proportion of patients with LDL screening, total cohort, PCMH relative to usual care                          | 2.42% decrease (p=.047)                   |
|                                 |                                                                    |                                 |      | Utilization: ED visits         | Point estimate OR of ED visits PCMH relative to usual care                                                    | OR 0.878 (CI 0.827, .993)                 |
|                                 |                                                                    |                                 |      | Utilization: admissions        | Point estimate OR of inpatient hospitalization, PCMH relative to usual care                                   | OR 0.886 (CI 0.844, 0.930)                |
|                                 |                                                                    |                                 |      |                                | Risk adjusted difference in total cost \$PMPM, medical benefit only, PCMH relative to usual care              | 12.65% decrease (from \$515.13 to 449.99) |
|                                 |                                                                    |                                 |      | Economic: total cost           | Risk adjusted difference in total cost \$PMPM, medical and pharmacy benefit only, PCMH relative to usual care | 14.50% decrease (from \$638.87 to 546.26) |
| <b>Reid, R et al, 2009 (17)</b> | WA, Group Health Adults Group Health Insurance (mix not specified) | Quasi-experimental 12-23 months | Fair | Utilization: ED visits         | Adjusted ED utilization rate ratio, PCMH relative to usual care                                               | Rate Ratio 0.71 (p<.001)                  |
|                                 |                                                                    |                                 |      | Utilization: ambulatory visits | Adjusted PCP utilization rate ratio, PCMH relative to usual care                                              | Rate ratio: 0.94 (p<.001)                 |
|                                 |                                                                    |                                 |      | Utilization: ambulatory visits | Adjusted specialty utilization rate ratio, PCMH relative to usual care                                        | Rate ratio: 1.08 (p<.001)                 |
|                                 |                                                                    |                                 |      | Utilization: admissions        | Adjusted total utilization rate ratio, PCMH relative to usual care                                            | Rate ratio: 1.03 (NS)                     |



|                                                                      |                                                     |                                  |      |                                |                                                                                        |                                                                                 |
|----------------------------------------------------------------------|-----------------------------------------------------|----------------------------------|------|--------------------------------|----------------------------------------------------------------------------------------|---------------------------------------------------------------------------------|
|                                                                      |                                                     |                                  |      | Utilization: admissions        | Adjusted ambulatory care sensitive utilization rate ratio, PCMH relative to usual care | Rate ratio: 0.89 (p<.001)                                                       |
|                                                                      |                                                     |                                  |      | Economic: total cost           | Adjusted difference in mean cost, \$per member per year                                | \$17 decrease (from \$6089 to 6107) NS)                                         |
|                                                                      |                                                     |                                  |      | Economic: primary care cost    | Adjusted difference in mean cost, \$per member per year                                | \$16 increase (from \$566 to 582, p<.05)                                        |
|                                                                      |                                                     |                                  |      | Economic: ED cost              | Adjusted difference in mean cost, \$per member per year                                | \$54 decrease (from \$292 to 238, p<.001)                                       |
|                                                                      |                                                     |                                  |      | Economic: specialty care cost  | Adjusted difference in mean cost, \$per member per year                                | \$37 increase (from \$1104 to 1140, NS)                                         |
|                                                                      |                                                     |                                  |      | Economic: inpatient costs      | Adjusted difference in mean cost, \$per member per year                                | \$9 increase (from \$2174 to 2183, NS)                                          |
| <b>Characteristics of Included Studies within Government Systems</b> |                                                     |                                  |      |                                |                                                                                        |                                                                                 |
| <b>Edwards S. et al, 2017 (73)</b>                                   | USA, VA<br>Older adult Veterans with diabetes<br>VA | Quasi-experimental<br>36+ months | Good | Utilization: hospitalizations  | OR for rates of hospitalizations for specific conditions, PCMH relative to usual care  | Ambulatory care-sensitive hospitalizations: OR 0.35 (CI .30, .42)               |
|                                                                      |                                                     |                                  |      |                                |                                                                                        | Dehydration: OR 0.21 (CI .14, .31)                                              |
|                                                                      |                                                     |                                  |      |                                |                                                                                        | CHF: OR 0.46 (CI 0.35, 0.60)                                                    |
|                                                                      |                                                     |                                  |      |                                |                                                                                        | UTI: OR 0.46 (CI .31, 0.71)                                                     |
|                                                                      |                                                     |                                  |      |                                |                                                                                        | Long-Term Diabetes Complications: OR 0.49 (CI .33, 0.75)                        |
|                                                                      |                                                     |                                  |      |                                |                                                                                        | COPD: OR 0.64 (0.42-0.98)                                                       |
|                                                                      |                                                     |                                  |      |                                |                                                                                        | No significant changes in hospitalizations for HTN, uncontrolled DM, or angina. |
| <b>Wong E. et al, 2016 (74)</b>                                      | USA, VA<br>Adult Veterans                           | Retrospective pre-test/post-test | Good | Utilization: outpatient visits | PCP visits in patients 65+, low-comorbidity, PCMH relative to usual care               | 0.5% increase (p=.029)                                                          |

|                                     |                                 |                                                    |      |                               |                                                                                                                                                                                               |                                                                    |
|-------------------------------------|---------------------------------|----------------------------------------------------|------|-------------------------------|-----------------------------------------------------------------------------------------------------------------------------------------------------------------------------------------------|--------------------------------------------------------------------|
|                                     | VA                              | 36+ months                                         |      |                               |                                                                                                                                                                                               |                                                                    |
|                                     |                                 |                                                    |      |                               | PCP visits in patients 65+, high-comorbidity, PCMH relative to usual care                                                                                                                     | 0.8 to 1.1% increase (p=.004)                                      |
|                                     |                                 |                                                    |      |                               | PCP visits in patients <65, low-comorbidity, PCMH relative to usual care                                                                                                                      | 1.1% increase (p=.062)                                             |
|                                     |                                 |                                                    |      |                               | PCP visits in patients <65, high-comorbidity, PCMH relative to usual care                                                                                                                     | 2.1% increase (p=.023)                                             |
| <b>Schubert C. et al, 2016 (38)</b> | IN, VA<br>Older Veterans<br>VA  | Prospective quasi-experimental<br><br>13-23 months |      | Utilization: ED visits        | Difference-in-difference rates of ED visits, PMCH relative to usual care                                                                                                                      | 7.1% decrease (p=.59)                                              |
|                                     |                                 |                                                    |      | Utilization: hospitalizations | Difference-in-difference rates of hospitalizations, PMCH relative to usual care                                                                                                               | 37.9% decrease (p=.14)                                             |
|                                     |                                 |                                                    |      | Utilization: readmissions     | Difference-in-difference rates of 30-day readmissions, PMCH relative to usual care                                                                                                            | 14.8% decrease (p=.19)                                             |
|                                     |                                 |                                                    |      | Utilization: total bed days   | Difference-in-difference rates of total bed days, PMCH relative to usual care                                                                                                                 | 28.5% decrease (p=.01)                                             |
|                                     |                                 |                                                    |      | Economic: total cost          | Estimated cost saving for PCMH implementation at 1 center (based on 15 avoided admissions and 53 readmissions minus the cost of program staff which included NPs, SWs, and support assistant) | \$273, 303                                                         |
| <b>O'Toole T. et al, 2016 (18)</b>  | USA, VA<br>Adult Veterans<br>VA | Cohort<br><br>24-35 months                         | Fair | Utilization: ED visits        | Pre-post difference in rates of ED visits at 6 months, PCMH relative to usual care                                                                                                            | 19% decrease (from 3022 visits to 2447 visits)                     |
|                                     |                                 |                                                    |      | Utilization: admissions       | Pre-post difference in rates of hospitalizations at 6 months, PCMH relative to usual care                                                                                                     | 34.7% decrease (from 812 hospitalizations to 530 hospitalizations) |

|                                    |                                                                                       |                                         |      |                                   |                                                                                        |                                                   |
|------------------------------------|---------------------------------------------------------------------------------------|-----------------------------------------|------|-----------------------------------|----------------------------------------------------------------------------------------|---------------------------------------------------|
| <b>Yoon J. et al, 2016 (33)</b>    | USA, VA<br>Adult Veterans<br>VA                                                       | Cohort<br>36+ months                    | Good | Utilization:<br>hospitalizations  | All cause admissions, advanced EBQI-PACT to PACT care                                  | IRR 1.05 (p=.570)                                 |
|                                    |                                                                                       |                                         |      | Utilization: ED visits            | ED visits, advanced EBQI-PACT to PACT care                                             | IRR 1.23 (p=.137)                                 |
|                                    |                                                                                       |                                         |      | Utilization: readmissions         | Readmissions for ambulatory care sensitive conditions, advanced EBQI-PACT to PACT care | IRR 1.42 (p=.319)                                 |
|                                    |                                                                                       |                                         |      | Utilization: telephone encounters | Telephone encounters, advanced EBQI-PACT to PACT care                                  | IRR 1.59 (p=.127)                                 |
|                                    |                                                                                       |                                         |      | Utilization: laboratory visits    | Laboratory visits, advanced EBQI-PACT to PACT care                                     | IRR 0.89 (p=.004)                                 |
|                                    |                                                                                       |                                         |      | Utilization: outpatient visits    | Primary Care visits, advanced EBQI-PACT to PACT care                                   | IRR 0.85 (p<.001)                                 |
|                                    |                                                                                       |                                         |      | Utilization: outpatient visits    | Specialty visits, advanced EBQI-PACT to PACT care                                      | IRR 0.83 (p<.001)                                 |
|                                    |                                                                                       |                                         |      | Utilization: outpatient visits    | Mental health/substance abuse visits, advanced EBQI-PACT to PACT care                  | IRR 0.69 (p<.001)                                 |
|                                    |                                                                                       |                                         |      | Economic: costs                   | Log of health care costs, log coefficient, advanced EBQI-PACT to PACT care             | Coefficient -0.03 (p=.615)                        |
|                                    |                                                                                       |                                         |      | Clinical: mortality               | OR for mortality at 1 year, advanced EBQI-PACT to PACT care                            | OR 1.27 (p=.147)                                  |
| <b>Andrews C. et al, 2015 (19)</b> | USA, Military Health System<br>Adults in military<br>Military Health System insurance | Pre-test/post-test<br>36+ months        | Good | Clinical: Hgb A1c                 | Average Hgb A1c, difference from start of intervention to end of study                 | 0.14% decrease in Hgb A1c (7.12 to 6.98%, p<.001) |
|                                    |                                                                                       |                                         |      | Utilization: ED visits            | Mean ED visits/ person from start of intervention to end of study                      | .09 visit increase (from 1.42 to 1.51)            |
|                                    |                                                                                       |                                         |      | Utilization: ED visits            | Overall ED visits/100 people from start of intervention to end of study                | 5.73 visit decrease (from 22.45 to 16.72)         |
| <b>Yoon J. et al, 2015 (67)</b>    | USA, VA<br>Adult Veterans                                                             | Retrospective pre-test/post-test cohort | Good | Utilization: outpatient visits    | PCP visits; percent change PCMH relative to usual care                                 | 17% decrease (p<.001)                             |

|                                     |                                 |                                                       |      |                                |                                                                                                      |                                           |
|-------------------------------------|---------------------------------|-------------------------------------------------------|------|--------------------------------|------------------------------------------------------------------------------------------------------|-------------------------------------------|
|                                     | VA                              | 24-35 months                                          |      |                                |                                                                                                      |                                           |
|                                     |                                 |                                                       |      | Utilization: outpatient visits | Specialty visits; percent change PCMH relative to usual care                                         | 2% increase (p<.001)                      |
|                                     |                                 |                                                       |      | Utilization: telephone visits  | Percent change PCMH relative to usual care                                                           | 85% increase (p<.001)                     |
|                                     |                                 |                                                       |      | Utilization: ED visits         | Percent change PCMH relative to usual care                                                           | 7% increase (p<.001)                      |
|                                     |                                 |                                                       |      | Utilizations: admissions       | Hospitalizations for ambulatory care sensitive condition; percent change PCMH relative to usual care | 50% increase (p<.001)                     |
|                                     |                                 |                                                       |      | Economic: total cost           | Percent change PCMH relative to usual care                                                           | 17% increase (p<.001)                     |
| <b>Bekelman D. et al, 2015 (46)</b> | USA, VA<br>Adult Veterans<br>VA | RCT<br>12-23 months                                   | Good | Clinical: health status        | KCCQ overall summary score (higher scores better), PCMH relative to usual care                       | 1 year: 54.2 vs 53.6 (p=.97)              |
|                                     |                                 |                                                       |      | Clinical: mortality            | 1 year mortality rate, PMCH relative to usual care                                                   | 5.3% decrease (from 9.6% to 4.3%, p=0.04) |
|                                     |                                 |                                                       |      | Clinical: mental health        | Depression scores on PHQ-9 (lower scores better), PCMH relative to usual care                        | 2.1 point decrease (CI 0.43, 3.78, p=.01) |
|                                     |                                 |                                                       |      | Utilization: admissions        | 1 year hospitalization rates, PCMH relative to usual care                                            | 29.4% vs 29.9% (p=.87)                    |
| <b>Randall I. et al, 2017 (29)</b>  | USA, VA<br>Adult Veterans<br>VA | Retrospective pre-test/post-test cohort<br>36+ months | Fair | Utilization: hospitalizations  | Estimated percentage change from pre-intervention to PCMH                                            | 8.61% decrease (p<.05)                    |
|                                     |                                 |                                                       |      | Utilization: outpatient visits | PCP visits, estimated percentage change from pre-intervention to PCMH                                | 10.7% increase (p<.05)                    |
|                                     |                                 |                                                       |      | Utilization: outpatient visits | Specialty visits, estimated percentage change from pre-intervention to PCMH                          | 7.54% decrease (p<.05)                    |
|                                     |                                 |                                                       |      | Utilization: outpatient visits | Mental health visits, estimated percentage change from pre-intervention to PCMH                      | 1.59% decrease (NS)                       |
|                                     |                                 |                                                       |      | Utilization: outpatient visits | Urgent care visits, estimated percentage change from pre-intervention to PCMH                        | 15.54% decrease (NS)                      |

|                                   |                                                                                                         |                                     |      |                                    |                                                                                                                                 |                                               |
|-----------------------------------|---------------------------------------------------------------------------------------------------------|-------------------------------------|------|------------------------------------|---------------------------------------------------------------------------------------------------------------------------------|-----------------------------------------------|
|                                   |                                                                                                         |                                     |      | Utilization: ED visits             | Estimated percentage change from pre-intervention to PCMH                                                                       | 0.59% decrease (NS)                           |
| <b>Fandre M. et al, 2014 (20)</b> | KY, Military Health System<br>Adults, non-active duty Army<br>Military Health System insurance          | Retrospective cohort<br>6-11 months | Fair | Utilization: ED visits             | Logistic regression model with log odds estimating effect of PCMH enrollment on ED visit rates                                  | OR: 0.334 (p=0.334)                           |
| <b>Smith J. et al, 2014 (21)</b>  | AK, Indian Health System<br>Adults with Indian Health System benefits<br>Indian Health System insurance | Pre-test/post-test<br>36+ months    | Fair | Process of care: diagnosis         | Rates of diagnosis of DM/10,000, PCMH relative to usual care                                                                    | 2 diagnosis/10,000/month increase (p=.017)    |
|                                   |                                                                                                         |                                     |      | Processes of care: Hgb A1c at goal | Hgb A1c <7%, PCMH relative to usual care                                                                                        | 6.2 screened patients/month increase (p=.135) |
|                                   |                                                                                                         |                                     |      | Utilization: screening             | Annual Hgb A1c screening rate/100, PCMH relative to usual care                                                                  | Rates of screening (NS)                       |
|                                   |                                                                                                         |                                     |      | Utilization: ED visits             | Average number of ED visits per patient, PCMH relative to usual care                                                            | 1 ED visit/10 patient decrease (p<.001)       |
|                                   |                                                                                                         |                                     |      | Utilization: admissions            | Average number of inpatient days for patients with DM, PCMH relative to usual care                                              | Number of inpatient days (NS)                 |
| <b>Hebert P. et al, 2014 (37)</b> | USA, VA<br>Adult Veterans<br>VA                                                                         | Pre-test/post-test<br>36+ months    | Good | Utilization: admissions            | Ambulatory care sensitive hospitalizations; % change in utilization for all ages from 2010 to 2012, PCMH relative to usual care | 1.7% decrease (p<.05)                         |
|                                   |                                                                                                         |                                     |      | Utilization: admissions            | Medical condition hospitalizations; % change in utilization for all ages from 2010 to 2012, PCMH relative to usual care         | 0.1% decrease (NS)                            |

|                                  |                                 |                                    |      |                                          |                                                                                                                        |                       |
|----------------------------------|---------------------------------|------------------------------------|------|------------------------------------------|------------------------------------------------------------------------------------------------------------------------|-----------------------|
|                                  |                                 |                                    |      | Utilization: admissions                  | Mental health hospitalizations; % change in utilization for all ages from 2010 to 2012, PCMH relative to usual care    | 0.1% increase (NS)    |
|                                  |                                 |                                    |      | Utilization: outpatient visits           | PCP visit % change in utilization for all ages from 2010 to 2012, PCMH relative to usual care                          | 1.0% increase (p<.05) |
|                                  |                                 |                                    |      | Utilization: outpatient visits           | Mental health visit % change in utilization for all ages from 2010 to 2012, PCMH relative to usual care                | 7.3% decrease (p<.05) |
|                                  |                                 |                                    |      | Utilization: outpatient visits           | Urgent care visit % change in utilization for all ages from 2010 to 2012, PCMH relative to usual care                  | 1.4% decrease (NS)    |
|                                  |                                 |                                    |      | Utilization: outpatient visits           | Specialty visit % change in utilization for all ages from 2010 to 2012, PCMH relative to usual care                    | 1.2% decrease (NS)    |
|                                  |                                 |                                    |      | Utilization: ED visits                   | Total % change in utilization for all ages from 2010 to 2012, PCMH relative to usual care                              | 1.6% increase (NS)    |
|                                  |                                 |                                    |      | Economic: outpatient cost                | Primary care estimated cost change in \$millions, PCMH relative to usual care                                          | \$155.0M increase     |
|                                  |                                 |                                    |      | Economic: outpatient cost                | Mental health care estimated cost change in \$millions, PCMH relative to usual care                                    | \$735.8M decrease     |
|                                  |                                 |                                    |      | Economic: inpatient cost                 | Estimated cost change in \$millions, PCMH relative to usual care                                                       | \$58.5M decrease      |
|                                  |                                 |                                    |      | Economic: total cost                     | Estimated cost change in \$millions, PCMH relative to usual care                                                       | \$639.3M decrease     |
| <b>Werner R. et al, 2014 (9)</b> | USA, VA<br>Adult Veterans<br>VA | Pre-test/post-test<br>24-35 months | Good | Utilization: telephone visits            | Effect of PCMH implementation on telephone visits, PMCH relative to usual care                                         | ES 0.007 (NS)         |
|                                  |                                 |                                    |      | Utilization: ED visits                   | Effect of PCMH on ED visits, PCMH relative to usual care                                                               | ES -0.012 (NS)        |
|                                  |                                 |                                    |      | Processes of care: follow up appointment | Effect of PMCH on ability for patient to obtain appointment within 3 days of desired date, PCMH relative to usual care | ES 0.119 (p<.01)      |
|                                  |                                 |                                    |      | Processes of care: follow up appointment | Effect of PCMH on contact within 2 days of discharge, PCMH relative to usual care                                      | ES -0.003 (NS)        |

|                                        |                                           |                                    |      |                                                                                                   |                                                                                                           |                                               |
|----------------------------------------|-------------------------------------------|------------------------------------|------|---------------------------------------------------------------------------------------------------|-----------------------------------------------------------------------------------------------------------|-----------------------------------------------|
| <b>Johnston J. et al, 2013 (22)</b>    | AK, Indian Health Services                | Prospective cohort                 |      | Utilization: admissions                                                                           | Hospital admissions as % of population from initiation of PCMH program to end of study                    | 0.17% decrease (from 0.91% to 0.74%, p<.001)) |
|                                        | Adults with Indian Health System benefits | 36+ months                         |      | Utilization: ED visits                                                                            | ED visits as % of population from initiation of PCMH program to end of study                              | 1.72% decrease (from 7.56% to 5.84%, p=0.035) |
|                                        |                                           |                                    |      | Utilization: admissions                                                                           | Asthma admissions as % of population from initiation of PCMH program to end of study period               | 0.1% decrease (0.7% to 0.6%, p <.001)         |
| <b>Yoon J. et al, 2013 (75)</b>        | USA, VA<br>Adult Veterans<br>VA           | Quasi-experimental<br>12-23 months | Fair | Utilization: admissions                                                                           | Adjusted odds ratio for admission based on primary care clinics with greater medical home adoption scores | OR 0.97 (p<.05)                               |
| <b>Christensen E. et al, 2013 (59)</b> | MD, Military Health System                | Quasi-experimental                 |      | Patient satisfaction: Difference in rate of positive survey response, PMCH relative to usual rate | Satisfied with health care at clinic                                                                      | 3.61% increase (p<.01)                        |
|                                        | Adults in military                        | 36+ months                         |      |                                                                                                   | High rating of PCP                                                                                        | 3.49% increase (p<.05)                        |
|                                        | Indian Health System insurance            |                                    |      |                                                                                                   | Access to care (composite)                                                                                | 9.75% increase (p<.001)                       |
|                                        |                                           |                                    |      |                                                                                                   | Access to PCP when needed                                                                                 | 11.06% increase (p<.001)                      |
|                                        |                                           |                                    |      |                                                                                                   | Satisfied with ease of scheduling                                                                         | 5.66% increase (p<.001)                       |
|                                        |                                           |                                    |      |                                                                                                   | Provider communication (composite)                                                                        | 2.79% increase (p<.01)                        |
|                                        |                                           |                                    |      |                                                                                                   | PCP listen carefully often or always                                                                      | 2.93% increase (p<.01)                        |
|                                        |                                           |                                    |      |                                                                                                   | PCP explains things often or always                                                                       | 3.61% increase (p<.01)                        |
|                                        |                                           |                                    |      |                                                                                                   | Customer service (composite)                                                                              | 4.51% increase (p<.001)                       |
|                                        |                                           |                                    |      |                                                                                                   | Trust in staff (composite)                                                                                | 2.01% increase (p<.01)                        |
|                                        |                                           |                                    |      | Patient activation (composite)                                                                    | 6.46% increase (p<.01)                                                                                    |                                               |
| <b>O'Toole T. et al, 2011 (47)</b>     | USA, VA<br>Adult Veterans                 | Quasi-experimental                 | Fair | Utilization: ED visits                                                                            | Rates of ED visit prior to and after PCMH implementation                                                  | 8.8% increase (P<.001)                        |

|                                    |                                                        |                                      |      |                                           |                                                                                                    |                                                                                        |
|------------------------------------|--------------------------------------------------------|--------------------------------------|------|-------------------------------------------|----------------------------------------------------------------------------------------------------|----------------------------------------------------------------------------------------|
|                                    | VA                                                     | 24-35 months                         |      |                                           |                                                                                                    |                                                                                        |
|                                    |                                                        |                                      |      | Utilization: outpatient visits            | Rates of visit type prior to and after PCMH implementation                                         | 25.2% increase (NS)                                                                    |
|                                    |                                                        |                                      |      | Utilization: admissions                   | Rates of inpatient visits type prior to and after PCMH implementation                              | 7.5% increase (p<.001)                                                                 |
|                                    |                                                        |                                      |      | Clinical: blood pressure                  | Difference in rates of patients at BP goal of 140/90 prior to and after PCMH implementation        | 17.3% increase (p<.001)                                                                |
|                                    |                                                        |                                      |      | Clinical: Hgb A1c                         | Difference in rates of patients at Hgb A1c goal of <9% prior to and after PCMH implementation      | 18.6% decrease (p<.001)                                                                |
|                                    |                                                        |                                      |      | Clinical: lipids                          | Difference in rates of patients at LDL <100 mg/dL prior to and after PCMH implementation           | 2.4% increase (p=.50)                                                                  |
| <b>O'Toole T. et al, 2010 (30)</b> | RI, VA<br>Adult Veterans, predominantly homeless<br>VA | Retrospective cohort<br>12-23 months | Good | Clinical: blood pressure                  | Difference in blood pressure, PCMH relative to usual care                                          | PCMH BP: -10/-7.4 relative to usual care - 4.2/-0.5; Systolic p=0.24, diastolic p=0.03 |
|                                    |                                                        |                                      |      | Clinical: lipids                          | Difference in LDL mg/dL, PCMH relative to usual care                                               | 5.8mg/dL decrease (p=.51)                                                              |
|                                    |                                                        |                                      |      | Clinical: Hgb A1c                         | Difference in Hgb A1c, PCMH relative to usual care                                                 | 2.5% absolute reduction in Hgb A1c (p=.03)                                             |
|                                    |                                                        |                                      |      | Processes of care: blood pressure at goal | Proportion of patients at target goal, PCMH relative to usual care                                 | 78.8% vs 75% (p=.45)                                                                   |
|                                    |                                                        |                                      |      | Processes of care: lipids at goal         | Proportion of patients at target goal, PCMH relative to usual care                                 | 57.1% vs 53.8% (p=.76)                                                                 |
|                                    |                                                        |                                      |      | Processes of care: DM measures at goal    | Proportion of patients at target goal, PCMH relative to usual care                                 | 65.4% vs 45.5% (p<.01)                                                                 |
|                                    |                                                        |                                      |      | Utilization: ambulatory visits            | Number of PCP visits per patient, PCMH relative to usual care, reported only as P value difference | p=.05                                                                                  |
|                                    |                                                        |                                      |      | Utilization: ED visits                    | Number of ED visits per patient, PCMH relative to usual care, reported only as P value difference  | p=.27                                                                                  |



|                                                                                   |                                                                                                                                                         |                                                       |      |                           |                                                                                                          |                                                                                         |
|-----------------------------------------------------------------------------------|---------------------------------------------------------------------------------------------------------------------------------------------------------|-------------------------------------------------------|------|---------------------------|----------------------------------------------------------------------------------------------------------|-----------------------------------------------------------------------------------------|
|                                                                                   |                                                                                                                                                         |                                                       |      | Utilization: admissions   | Number of hospitalizations per patient, PCMH relative to usual care, reported only as P value difference | p=.02                                                                                   |
| <b>Edes T. et al, 2014 (31)</b>                                                   | USA, VA<br>Adult Veterans<br>VA                                                                                                                         | Cohort<br>12-23 months                                | Fair | Utilization: admissions   | Total VA and Medicare hospital admissions per patient, PCMH relative to usual care                       | 25.5% decrease (from 15.7 to 11.7, p <.01)                                              |
|                                                                                   |                                                                                                                                                         |                                                       |      | Economic: total cost      | Annualized cost during PCMH intervention relative to projected pre-intervention control                  | 11.7% decrease (\$39,796 vs \$45,061, p <.001)                                          |
| <b>Characteristics of Included Studies within Non-Integrated Delivery Systems</b> |                                                                                                                                                         |                                                       |      |                           |                                                                                                          |                                                                                         |
| <b>Newman R. et al, 2017. (23)</b>                                                | Eastern Virginia Medical School, VA<br>Adults<br>Insurance mix not specified but included Medicare and Medicare Advantage                               | Prospective pre-post study<br>24-35 months            | Fair | Utilization: readmissions | Monthly 30-day readmission rates after intervention, PCMH relative to usual care                         | 3.9% decrease from 22.2% to 18.3% (p=.0233)                                             |
|                                                                                   |                                                                                                                                                         |                                                       |      | Utilization: ED visits    | Monthly ED visits, PCMH relative to usual care                                                           | 17% reduction from 176/month to 146/month (p <.001)                                     |
| <b>Cuellar A. et al, 2016 (24)</b>                                                | CareFirst<br>BlueCross<br>BlueShield's<br>PCMH, Maryland, Washington DC, and Virginia<br>Adults<br>Blue Cross Blue Shield Insurance (mix not specified) | Retrospective quasi-experimental cohort<br>36+ months | Fair | Economic: total cost      | Yearly claims expenditures per member for all covered services                                           | Year 1: No significant change in total expenditures between intervention and comparison |

|                                      |                                                                                                  |                                             |      |                                  |                                                                                                          |                                                                       |
|--------------------------------------|--------------------------------------------------------------------------------------------------|---------------------------------------------|------|----------------------------------|----------------------------------------------------------------------------------------------------------|-----------------------------------------------------------------------|
|                                      |                                                                                                  |                                             |      |                                  |                                                                                                          | Year 2: 2.8% decrease (CI -\$191.82, -\$26.92) in PCMH group          |
|                                      |                                                                                                  |                                             |      |                                  |                                                                                                          | Total 3-year: \$297 decrease (CI -\$471.411, -\$123.59) in PCMH group |
|                                      |                                                                                                  |                                             |      | Economic: inpatient care         | Inpatient spending per patient                                                                           | Total 3-year 3: 5.0% decrease (-\$23, CI \$-35, -\$11) in PCMH group  |
|                                      |                                                                                                  |                                             |      | Economic: ED care                | ED spending per patient                                                                                  | Total 3-year: 4.5% decrease (-\$8, CI -\$11, -\$5) in PCMH group      |
|                                      |                                                                                                  |                                             |      | Economic: prescription drug cost | Prescription drug spending per patient                                                                   | Total 3-year: 2.7% decrease (-\$14, CI -\$20, -\$9) in PCMH group     |
|                                      |                                                                                                  |                                             |      | Utilization: admissions          | Inpatient admissions / 1000 patients                                                                     | Year 3-year: 2.4% decrease (2.4/1000, CI -2.8, -2.2)                  |
|                                      |                                                                                                  |                                             |      | Utilization: ED visits           | ED visits / 1000 patients                                                                                | Total 3-year: 3.2% decrease (9.9/1000, CI -9.0, -7.7)                 |
| <b>Eisenstat S. et al, 2016 (49)</b> | Massachusetts General Hospital Primary Care Clinics; MA<br>Adults<br>Insurance mix not specified | Pre-test/post-test cohort<br>24-35 months   | Good | Clinical outcome: Hgb A1c%       | Proportion of patients with T2DM who had Hgb A1c >9% at end of study period, PCMH relative to usual care | 1.5% decrease (from 13.9% to 12.4%, p <.001)                          |
| <b>Shane D. et al, 2016 (39)</b>     | Iowa Medicaid Health Homes, IA<br>Adults<br>Medicaid insurance                                   | Quasi-experimental pre/post<br>12-23 months | Good | Utilization: ED visits           | Difference-in-difference estimator for monthly rate of ED visit PMPM, PCMH relative to usual care        | 1.4% decrease (SE .002, p<.01)                                        |

|                                 |                                                                                                                                                                                                                                     |                                        |      |                                             |                                                                                                            |                                       |
|---------------------------------|-------------------------------------------------------------------------------------------------------------------------------------------------------------------------------------------------------------------------------------|----------------------------------------|------|---------------------------------------------|------------------------------------------------------------------------------------------------------------|---------------------------------------|
|                                 |                                                                                                                                                                                                                                     |                                        |      | Economic: total costs                       | Difference-in-difference estimate for average monthly member total cost, PMPM, PCMH relative to usual care | \$132.10 decrease (SE \$25.40, p<.01) |
|                                 |                                                                                                                                                                                                                                     |                                        |      | Economic: ED costs                          | Difference-in-difference estimator for average monthly member ED cost, PMPM, PCMH relative to usual care   | \$11.80 decrease (SE \$2.01, p<.01)   |
| <b>Kern L. et al, 2016 (34)</b> | Taconic Health Information Network and Community (THINC), NY<br><br>Adults<br><br>Aetna, United Healthcare, Empire Blue Cross Blue Shield, Physicians' Health Plan, MVP Healthcare, Hudson health Plan, insurance mix not specified | Retrospective cohort<br><br>36+ months | Good | Utilization: ED visits                      | Incidence rate ratio of outcome, PCMH relative to EHR intervention                                         | IRR 1.08 (CI 0.98, 1.20, p=1.22)      |
|                                 |                                                                                                                                                                                                                                     |                                        |      | Utilization: outpatient visits              | Incidence rate ratio of primary care visit PCMH relative to EHR intervention                               | IRR 1.07 (CI 1.05, 1.09, p<.001)      |
|                                 |                                                                                                                                                                                                                                     |                                        |      | Utilization: outpatient visits              | Incidence rate ratio of specialty care visit PCMH relative to EHR intervention                             | IRR 0.90 (CI 0.87, 0.92, p<.001)      |
|                                 |                                                                                                                                                                                                                                     |                                        |      | Utilization: laboratory visits              | Incidence rate ratio of outcome, PCMH relative to EHR intervention                                         | IRR 0.96 (CI 0.94, 0.99, p=.007)      |
|                                 |                                                                                                                                                                                                                                     |                                        |      | Utilization: radiology and diagnostic tests | Incidence rate ratio of outcome, PCMH relative to EHR intervention                                         | IRR 0.96 (CI 0.93, 0.99, p=.020)      |
|                                 |                                                                                                                                                                                                                                     |                                        |      | Processes of care: screening                | Relative risk of retinal examination for patients with DM, PCMH relative to EHR intervention               | RR 1.07 (CI 1.00, 1.15, p=.059)       |
|                                 |                                                                                                                                                                                                                                     |                                        |      | Processes of care: screening                | Relative risk of Hgb A1c testing for patients with DM, PCMH relative to EHR intervention                   | RR 1.07 (CI 1.03, 1.10, p<.001)       |

|                                      |                                                                   |                                          |      |                                           |                                                                                                                    |                                 |
|--------------------------------------|-------------------------------------------------------------------|------------------------------------------|------|-------------------------------------------|--------------------------------------------------------------------------------------------------------------------|---------------------------------|
|                                      |                                                                   |                                          |      | Processes of care: screening              | Relative risk of LDL testing for patients with DM, PCMH relative to EHR intervention                               | RR 0.97 (CI .94, 1.01, p=.135)  |
|                                      |                                                                   |                                          |      | Processes of care: screening              | Relative risk of nephropathy screening for patients with DM, PCMH relative to EHR intervention                     | RR 1.07 (CI 1.01, 1.12, p=.014) |
|                                      |                                                                   |                                          |      | Processes of care: screening              | Relative risk of breast cancer screening, PCMH relative to EHR intervention                                        | RR 1.02 (CI 1.00, 1.04, p=.113) |
|                                      |                                                                   |                                          |      | Processes of care: screening              | Relative risk of chlamydia screening for women, PCMH relative to EHR intervention                                  | RR 1.25 (CI 1.10, 1.42, p<.001) |
|                                      |                                                                   |                                          |      | Processes of care: screening              | Relative risk of colorectal cancer screening, PCMH relative to EHR intervention                                    | RR .99 (CI .96, 1.01, p=.32)    |
|                                      |                                                                   |                                          |      | Process of care: medication prescriptions | Relative risk of appropriate medications for patient with DM, PCMH relative to EHR intervention                    | RR 0.98 (CI 0.88, 1.09, p=.71)  |
| <b>Domino M. et al, 2016 (76)</b>    | Community Care North Carolina, NC<br>Adults<br>Medicaid insurance | Quasi-experimental<br>Less than 6 months | Good | Utilization: follow up                    | Effect of medical home intervention in 7 day follow up with PCP after schizophrenia admission                      | ES 1.8 (p<.01)                  |
|                                      |                                                                   |                                          |      | Utilization: follow up                    | Effect of medical home intervention in 7 day follow up with mental health specialist after schizophrenia admission | ES -2.0 (p<.05)                 |
|                                      |                                                                   |                                          |      | Utilization: follow up                    | Effect of medical home intervention in 7 day follow up with PCP after depression admission                         | ES 3.4 (p<.01)                  |
|                                      |                                                                   |                                          |      | Utilization: follow up                    | Effect of medical home intervention in 7 day follow up with mental health specialist after depression admission    | ES 0.14 (p>.05)                 |
| <b>Rosenthal M. et al, 2016 (51)</b> | Health Improvement Collaborate of Greater Cincinnati, OH          | Cohort<br>24-35 months                   | Good | Utilization: outpatient visits            | Primary care visits, effect as percentage of pilot baseline relative to comparison group                           | 0.1% decrease (p=.87)           |

|  |                                                                                              |  |  |                                   |                                                                                                                            |                         |
|--|----------------------------------------------------------------------------------------------|--|--|-----------------------------------|----------------------------------------------------------------------------------------------------------------------------|-------------------------|
|  | Adults<br><br>Anthem, Humana,<br>and United<br>Healthcare,<br>insurance mix not<br>specified |  |  |                                   |                                                                                                                            |                         |
|  |                                                                                              |  |  | Utilization:<br>outpatient visits | Specialty visits, effect as percentage of<br>pilot relative to comparison group                                            | 1.3% decrease (p=.44)   |
|  |                                                                                              |  |  | Utilization: ED visits            | Effect as percentage of pilot baseline<br>relative to comparison group                                                     | 7.2% decrease (p=.08)   |
|  |                                                                                              |  |  | Utilization:<br>admissions        | Inpatient admissions, effect as percentage<br>of pilot baseline relative to comparison<br>group                            | 4.3% decrease (p=.47)   |
|  |                                                                                              |  |  | Utilization: ED visits            | Ambulatory care sensitive emergency<br>room visits, effect as percentage of pilot<br>baseline relative to comparison group | 22.6% (p=.01)           |
|  |                                                                                              |  |  | Utilization:<br>admissions        | Ambulatory care sensitive admissions,<br>effect as percentage of pilot baseline<br>relative to comparison group            | 22.7% (p=.99)           |
|  |                                                                                              |  |  | Economic: total cost              | Total costs of care \$ PMPM, PCM<br>relative to usual care                                                                 | \$7.70 decrease (p=.99) |
|  |                                                                                              |  |  | Processes of care:<br>screening   | Hgb A1c testing for patients with<br>diabetes, effect as % of PCMH relative to<br>usual care                               | 0.4% increase (p=.37)   |
|  |                                                                                              |  |  | Processes of care:<br>screening   | Lipid testing for patients with diabetes,<br>effect as % of PCMH relative to usual<br>care                                 | 3.3% increase (p<.001)  |
|  |                                                                                              |  |  | Processes of care:<br>screening   | Dilated exam for patients with diabetes,<br>effect as % of PCMH relative to usual<br>care                                  | 0.2% decrease (p=.90)   |
|  |                                                                                              |  |  | Processes of care:<br>screening   | Colon cancer screening, effect as % of<br>PCMH relative to usual care                                                      | 3.7% increase (p=.10)   |
|  |                                                                                              |  |  | Processes of care:<br>screening   | Breast cancer screening, effect as % of<br>PCMH relative to usual care                                                     | 1.4% increase (p=.08)   |
|  |                                                                                              |  |  | Processes of care:<br>screening   | Cervical cancer screening, effect as % of<br>PCMH relative to usual care                                                   | 1.0% increase (p=.42)   |

|                                      |                                                                                |                                                                   |                         |                                                     |                                                                                                        |                          |
|--------------------------------------|--------------------------------------------------------------------------------|-------------------------------------------------------------------|-------------------------|-----------------------------------------------------|--------------------------------------------------------------------------------------------------------|--------------------------|
| <b>Rosenthal M. et al, 2015 (52)</b> | Rochester Medical Home Initiative, NY                                          | Cohort<br>36+ months                                              | Good                    | Utilization: admissions                             | Difference in difference estimator of PCMH relative to usual care                                      | 0.01% decrease (p=.51)   |
|                                      | Adults                                                                         |                                                                   |                         | Utilization: ED visits                              | Difference in difference estimator of PCMH relative to usual care                                      | 0.01% decrease (p=.30)   |
|                                      | Excellus BlueCross BlueShield and MVP Health Care, insurance mix not specified |                                                                   |                         | Utilization: ED visits                              | Ambulatory care sensitive ED visits, difference in difference estimator of PCMH relative to usual care | 0.01% increase (p=.67)   |
|                                      |                                                                                |                                                                   |                         | Utilization: outpatient visits                      | PCP visits, difference in difference estimator of PCMH relative to usual care                          | 0.01% increase (p<.001)  |
|                                      |                                                                                |                                                                   |                         | Utilization: outpatient visits                      | Specialty visits, difference in difference estimator of PCMH relative to usual care                    | 0% (p=.48)               |
|                                      |                                                                                |                                                                   |                         | Utilization: imaging testing                        | Difference in difference estimator of PCMH relative to usual care                                      | 0.16% decrease (p<.001)  |
|                                      |                                                                                |                                                                   |                         | Utilization: laboratory testing                     | Difference in difference estimator of PCMH relative to usual care                                      | 0.01% increase (p=0.037) |
|                                      |                                                                                |                                                                   |                         | Utilization: prescription days supply               | Difference in difference estimator of PCMH relative to usual care                                      | 0% (p=0.05)              |
|                                      |                                                                                |                                                                   |                         | Processes of care: any prevention quality indicator | Difference in difference estimator of PCMH relative to usual care                                      | 0.15% decrease (p=0.027) |
|                                      |                                                                                |                                                                   |                         | Economic: total cost                                | Difference in difference estimator of PCMH relative to usual care                                      | 0.01% decrease (p=0.016) |
|                                      | Economic: inpatient spending                                                   | Difference in difference estimator of PCMH relative to usual care | 0.01% increase (p=.015) |                                                     |                                                                                                        |                          |
|                                      | Economic: prescription spending                                                | Difference in difference estimator of PCMH relative to usual care | 0.01% decrease (p=0.13) |                                                     |                                                                                                        |                          |

|                                      |                                                                                                                                  |                                                           |      |                              |                                                                                                                    |                                                     |
|--------------------------------------|----------------------------------------------------------------------------------------------------------------------------------|-----------------------------------------------------------|------|------------------------------|--------------------------------------------------------------------------------------------------------------------|-----------------------------------------------------|
|                                      |                                                                                                                                  |                                                           |      | Processes of care: screening | Breast cancer screening, difference in difference estimator of PCMH relative to usual care                         | 2.62% increase (p=.005)                             |
|                                      |                                                                                                                                  |                                                           |      | Processes of care: screening | Cervical cancer screening, difference in difference estimator of PCMH relative to usual care                       | 0.62% decrease (p=.363)                             |
|                                      |                                                                                                                                  |                                                           |      | Processes of care: screening | Chlamydia screening, difference in difference estimator of PCMH relative to usual care                             | 6.66% increase (p=.198)                             |
|                                      |                                                                                                                                  |                                                           |      | Processes of care: screening | Hgb A1c testing in patients with diabetes, difference in difference estimator of PCMH relative to usual care       | 2.42% increase (p=.138)                             |
|                                      |                                                                                                                                  |                                                           |      | Processes of care: screening | LDL testing in patients with diabetes, difference in difference estimator of PCMH relative to usual care           | 3.83% increase (p=.048)                             |
|                                      |                                                                                                                                  |                                                           |      | Processes of care: screening | Retinopathy screening in patients with diabetes, difference in difference estimator of PCMH relative to usual care | 2.63% decrease (p=.264)                             |
|                                      |                                                                                                                                  |                                                           |      | Processes of care: screening | Nephropathy screening in patients with diabetes, difference in difference estimator of PCMH relative to usual care | 2.56% increase (p=.263)                             |
| <b>Rosenthal M. et al, 2016 (25)</b> | Health TeamWork and Cover Colorado, CO<br><br>Adults<br><br>Aetna, Cigna, Humana, United HealthCare, insurance mix not specified | Retrospective pre-test/post-test cohort<br><br>36+ months | Good | Processes of care: screening | Odds ratio of Hgb A1c testing for patients with diabetes, PCMH relative to usual care                              | 2 year: OR 0.94 (p=.09);<br>3 year: OR 0.92 (p=.03) |
|                                      |                                                                                                                                  |                                                           |      | Processes of care: screening | Odds ratio of lipid testing for patients with diabetes, PCMH relative to usual care                                | 2 year: OR 1.01 (p=.44);<br>3 year: OR 1 (p=.97)    |
|                                      |                                                                                                                                  |                                                           |      | Processes of care: screening | Odds ratio of retinopathy testing for patients with diabetes, PCMH relative to usual care                          | 2 year: OR 0.99 (p=.41);<br>3 year: OR 1 (p=.71)    |

|                                  |                                                                                       |                                        |      |                                       |                                                                                                          |                                                    |
|----------------------------------|---------------------------------------------------------------------------------------|----------------------------------------|------|---------------------------------------|----------------------------------------------------------------------------------------------------------|----------------------------------------------------|
|                                  |                                                                                       |                                        |      | Processes of care: screening          | Odds ratio of colorectal cancer screening, PCMH relative to usual care                                   | 2 year: OR 0.85 (p<.001); 3 year: OR 0.88 (p<.001) |
|                                  |                                                                                       |                                        |      | Processes of care: screening          | Odds ratio of breast cancer screening, PCMH relative to usual care                                       | 2 year: OR 1.02 (p=.17); 3 year: OR 1.09 (p<.001)  |
|                                  |                                                                                       |                                        |      | Processes of care: screening          | Odds ratio of cervical cancer screening, PCMH relative to usual care                                     | 2 year: OR 1.10 (p<.01); 3 year: OR 1.09 (p<.001)  |
|                                  |                                                                                       |                                        |      | Economic: total cost                  | Total cost of care PMPM; effect size as percent pilot relative to comparison group                       | 2 year: -1.1% (p=.06); 3 year: -2.1% (p=.24)       |
|                                  |                                                                                       |                                        |      | Economic: inpatient cost              | Inpatient costs PMPM; effect size as percent pilot relative to comparison group                          | 2 year: -4.2% (p=.50); 3 year: -7.7% (p=.37)       |
|                                  |                                                                                       |                                        |      | Economic: ED costs                    | ED costs PMPM; effect size as percent pilot relative to comparison group                                 | 2 year: -13.9% (p<.001); 3 year: -11.8% (p<.001)   |
|                                  |                                                                                       |                                        |      | Utilization: outpatient visits        | Primary care; effect size as percent pilot relative to comparison group                                  | 2 year: -0.4% (p=.62); 3 year: -1.5% (p=.02)       |
|                                  |                                                                                       |                                        |      | Utilization: outpatient visits        | Specialty care; effect size as percent pilot relative to comparison group                                | 2 year: 0.6% (p=.8); 3 year: -2.0% (p=.38)         |
|                                  |                                                                                       |                                        |      | Utilization: admissions               | Ambulatory care sensitive hospital admissions; effect size as percent pilot relative to comparison group | 2 year: -18.3% (p=.38); 3 year: -18.9% (p=.23)     |
|                                  |                                                                                       |                                        |      | Utilization: admissions               | Total hospital admissions; effect size as percent pilot relative to comparison group                     | 2 year: -2.6% (p=.94); 3 year: -3.1% (p=.48)       |
|                                  |                                                                                       |                                        |      | Utilization: ED visits                | Total ED visits; effect size as percent pilot relative to comparison group                               | 2 year: -7.9% (p=.02); 3 year: -9.3% (p=.01)       |
|                                  |                                                                                       |                                        |      | Utilization: ED visits                | Ambulatory care sensitive ED visits; effect size as percent pilot relative to comparison group           | 2 year: 0.7% (p=.91); 3 year: 4.6% (p=.51)         |
|                                  |                                                                                       |                                        |      | Utilization: prescription days supply | Days of treatment supplied; effect size as percent pilot relative to comparison group                    | 2 year: -2.1% (p=.12); 3 year: -2.2% (p=.11)       |
| <b>Jones C. et al, 2016 (40)</b> | Vermont's all payer medical home; VT<br><br>Adults, children (excluded from analysis) | Retrospective cohort<br><br>36+ months | Good | Economic: total cost                  | Difference in difference estimator per capita, PCMH relative to usual care                               | -\$482.40 (p<.001)                                 |



|  |                                                      |  |  |                                |                                                                                                                       |                    |
|--|------------------------------------------------------|--|--|--------------------------------|-----------------------------------------------------------------------------------------------------------------------|--------------------|
|  | Medicare, Medicaid, and 3 commercial insurance plans |  |  |                                |                                                                                                                       |                    |
|  |                                                      |  |  | Economic: inpatient spending   | Difference in difference estimator per capita, PCMH relative to usual care                                            | -\$515.20 (p<.001) |
|  |                                                      |  |  | Economic: ED spending          | Difference in difference estimator per capita, PCMH relative to usual care                                            | -\$1.90 (p=.560)   |
|  |                                                      |  |  | Utilization: ED visits         | Difference in difference estimator per capita, PCMH relative to usual care                                            | 5.2 (p=.207)       |
|  |                                                      |  |  | Utilization: outpatient visits | PCP visits; Difference in difference estimator annual utilization per 1000 members, PCMH relative to usual care       | -27.9 (p=.094)     |
|  |                                                      |  |  | Utilization: outpatient visits | Specialty visits; Difference in difference estimator annual utilization per 1000 members, PCMH relative to usual care | -13.3 (p=.150)     |
|  |                                                      |  |  | Utilization: imaging testing   | Standard imaging; Difference in difference estimator annual utilization per 1000 members, PCMH relative to usual care | -42.8 (p<.001)     |
|  |                                                      |  |  | Utilization: imaging testing   | Advanced imaging; Difference in difference estimator annual utilization per 1000 members, PCMH relative to usual care | -14.7 (p<.001)     |
|  |                                                      |  |  | Utilization: screening         | Breast cancer screening; difference in difference estimator as % of preventative and effective care                   | 0.7% (p=.583)      |
|  |                                                      |  |  | Utilization: screening         | Cervical cancer screening; difference in difference estimator as % of preventative and effective care                 | 1.5% (p=.144)      |
|  |                                                      |  |  | Utilization: screening         | Retinopathy screening in patients with DM; difference in difference estimator as % of preventative and effective care | 4.3% (p<.001)      |
|  |                                                      |  |  | Utilization: screening         | Hgb A1c in patients with DM; difference in difference estimator as % of preventative and effective care               | 0.8% (p=.710)      |

|                                      |                                                     |                               |      |                                |                                                                                                                       |                         |
|--------------------------------------|-----------------------------------------------------|-------------------------------|------|--------------------------------|-----------------------------------------------------------------------------------------------------------------------|-------------------------|
|                                      |                                                     |                               |      | Utilization: screening         | LDL screening in patients with DM; difference in difference estimator as % of preventative and effective care         | 4.7% (p=.030)           |
|                                      |                                                     |                               |      | Utilization: screening         | Nephropathy screening in patients with DM; difference in difference estimator as % of preventative and effective care | 3.3% (p=.136)           |
| <b>Farrell T. et al, 2015 (77)</b>   | University of Utah Community Clinics, UT            | Retrospective pre/post cohort | Good | Utilization: readmissions      | % difference in readmission rate after implementation of PCMH intervention                                            | 30 days: -9.9% (p<0.05) |
|                                      | Adults                                              | 6-11 months                   |      |                                |                                                                                                                       |                         |
|                                      | Mixed (Commercial > Medicare > Medicaid)            |                               |      |                                |                                                                                                                       |                         |
|                                      |                                                     |                               |      |                                |                                                                                                                       |                         |
|                                      |                                                     |                               |      |                                |                                                                                                                       | 60 days: -16.4% (p<.01) |
|                                      |                                                     |                               |      |                                |                                                                                                                       | 90 days: -20.4% (p<.01) |
|                                      |                                                     |                               |      |                                |                                                                                                                       | 180 days: 30.3% (p<.01) |
| <b>Romanelli R. et al, 2015 (32)</b> | Davis Family Clinic - Sutter Medical Foundation, CA | Retrospective cohort          | Good | Clinical: blood pressure       | Adjusted OR of BP at goal, PCMH relative to usual care                                                                | OR 1.26 (p=.202)        |
|                                      | Adults                                              | 6-11 months                   |      |                                |                                                                                                                       |                         |
|                                      | Mixed (Commercial > Medicare > Medicaid)            |                               |      |                                |                                                                                                                       |                         |
|                                      |                                                     |                               |      |                                |                                                                                                                       |                         |
|                                      |                                                     |                               |      |                                |                                                                                                                       |                         |
|                                      |                                                     |                               |      |                                |                                                                                                                       |                         |
|                                      |                                                     |                               |      |                                |                                                                                                                       |                         |
|                                      |                                                     |                               |      | Clinical: lipids               | Adjusted OR of LDL cholesterol at goal, PCMH relative to usual care                                                   | OR 0.63 (p=.108)        |
|                                      |                                                     |                               |      | Clinical: Hgb A1c              | Adjusted OR of Hgb A1c at goal, PCMH relative to usual care                                                           | OR 0.73 (p=.455)        |
|                                      |                                                     |                               |      | Utilization: ED visits         | Adjusted IRR of ED visit, PCMH relative to usual care                                                                 | IRR 0.89 (p=.377)       |
|                                      |                                                     |                               |      | Utilization: outpatient visits | Adjusted IRR of office visit, PCMH relative to usual care                                                             | IRR 0.88 (p=.0355)      |

|                                              |                                                   |                                                |      | Utilization:<br>admissions | Adjusted IRR of hospitalization, PCMH<br>relative to usual care                                                  | IRR 0.82 (p=.330)                |
|----------------------------------------------|---------------------------------------------------|------------------------------------------------|------|----------------------------|------------------------------------------------------------------------------------------------------------------|----------------------------------|
| <b>Markovitz<br/>A. et al,<br/>2015 (78)</b> | University of<br>Michigan, MI                     | Pre-test/post-<br>test                         | Good | Utilization: screening     | Breast cancer screening rates at 3 years,<br>PCMH relative to usual care                                         | 76.1% to 74.6% (not<br>reported) |
|                                              | Adults                                            | 36+ months                                     |      |                            |                                                                                                                  |                                  |
|                                              |                                                   |                                                |      | Utilization: screening     | Cervical cancer screening rates at 3 years,<br>PCMH relative to usual care                                       | 76.9% to 73.7% (not<br>reported) |
|                                              |                                                   |                                                |      | Utilization: screening     | Colorectal cancer screening rates at year<br>3, PCMH relative to usual care                                      | 50.5% to 50.0% (not<br>reported) |
| <b>Page T. et<br/>al, 2015<br/>(53)</b>      | Health Choice<br>Network of Florida<br>(FQHC), FL | Retrospective<br>pre-test/post-<br>test cohort | Fair | Utilization: screening     | Eye exam, percent change from baseline<br>to 1 year, PCMH relative to usual care                                 | 5.6% increase (p<.001)           |
|                                              | Adults with<br>diabetes                           | 12-23<br>months                                |      |                            |                                                                                                                  |                                  |
|                                              |                                                   |                                                |      | Utilization: screening     | Foot exam, percent change from baseline<br>to 1 year, PCMH relative to usual care                                | 10.9% increase (p<.001)          |
|                                              |                                                   |                                                |      | Utilization: screening     | Dental exam, percent change from<br>baseline to 1 year, PCMH relative to<br>usual care                           | 1.5% increase (p=.1422)          |
|                                              |                                                   |                                                |      | Utilization: screening     | Nephropathy screening (urine protein),<br>percent change from baseline to 1 year,<br>PCMH relative to usual care | 4.4% increase (p<.001)           |
|                                              |                                                   |                                                |      | Utilization: screening     | CKD screening (serum Cr), percent<br>change from baseline to 1 year, PCMH<br>relative to usual care              | 1.9% increase (p=.0158)          |

|                                     |                                                                                                     |                                      |      |                                          |                                                                                                  |                                     |
|-------------------------------------|-----------------------------------------------------------------------------------------------------|--------------------------------------|------|------------------------------------------|--------------------------------------------------------------------------------------------------|-------------------------------------|
|                                     |                                                                                                     |                                      |      | Utilization: screening                   | Colorectal cancer screening, percent change from baseline to 1 year, PCMH relative to usual care | 5.1% increase (p<.001)              |
|                                     |                                                                                                     |                                      |      | Utilization: screening                   | Cervical cancer screening, percent change from baseline to 1 year, PCMH relative to usual care   | 0.3% increase (p=.6097)             |
|                                     |                                                                                                     |                                      |      | Utilization: screening                   | Hgb A1c testing, percent change from baseline to 1 year, PCMH relative to usual care             | 2.4% increase (p<.001)              |
|                                     |                                                                                                     |                                      |      | Utilization: screening                   | LDL testing, percent change from baseline to 1 year, PCMH relative to usual care                 | 0.1% decrease (p=.8988)             |
|                                     |                                                                                                     |                                      |      | Processes of care: vaccines              | Flu vaccine, percent change from baseline to 1 year, PCMH relative to usual care                 | 19.3% increase (p<.001)             |
|                                     |                                                                                                     |                                      |      | Processes of care: vaccines              | Pneumovax vaccine, percent change from baseline to 1 year, PCMH relative to usual care           | 8.6% increase (p<.001)              |
| <b>Carrillo J. et al, 2014 (26)</b> | NY Presbyterian / Columbia - Regional Health Collaborative, NY<br><br>Adults<br><br>Mixed insurance | Pre-test/post-test<br><br>36+ months | Good | Utilization: ED visits                   | Mean ED visits/ person from start of intervention to year 3, PMCH relative to usual care         | 22.9% decrease (p<.001)             |
|                                     |                                                                                                     |                                      |      | Utilization: admissions                  | Mean hospitalizations/ person from start of intervention to year 3, PMCH relative to usual care  | 24.4% decrease (p<.001)             |
|                                     |                                                                                                     |                                      |      | Utilization: readmissions                | 30 day readmission rate from start of intervention to year 4, PCMH relative to usual care        | 36.7% decrease (p<.001)             |
|                                     |                                                                                                     |                                      |      | Utilization: length of stay              | Average LOS from start of intervention to year 4, PCMH relative to usual care                    | 4.9% decrease (p<.001)              |
|                                     |                                                                                                     |                                      |      | Economic: estimated return on investment | **estimated ROI for each dollar spent                                                            | \$1.11 return for each \$1.00 spent |
| <b>Higgins S. et al, 2014 (79)</b>  | Pennsylvania Chronic Care Initiative, PA                                                            | Longitudinal case control            | Good | Utilization: admissions                  | % change in inpatient utilization / 1000 patients at year 3, PCMH relative to usual care         | 16.6% decrease (p=.1)               |

|                                     |                                                                      |                                  |      |                                                                                                                        |                                                                                          |                     |
|-------------------------------------|----------------------------------------------------------------------|----------------------------------|------|------------------------------------------------------------------------------------------------------------------------|------------------------------------------------------------------------------------------|---------------------|
|                                     | Adults<br>Mix of Independence Blue Cross, 3 Medicaid MCOs            | 36+ months                       |      |                                                                                                                        |                                                                                          |                     |
|                                     |                                                                      |                                  |      | Utilization: ED visits                                                                                                 | % change in ED utilization / 1000 patients at year 3, PCMH relative to usual care        | 18.4% increase (NS) |
|                                     |                                                                      |                                  |      | Utilization: outpatient visits                                                                                         | % change in specialty utilization / 1000 patients at year 3, PCMH relative to usual care | 15.2% increase (NS) |
|                                     |                                                                      |                                  |      | Economic: total cost                                                                                                   | % change in cost, PMPM at year 3, PCMH relative to usual care                            | 2.9% decrease (NS)  |
|                                     |                                                                      |                                  |      | Economic: inpatient cost                                                                                               | % change in cost, PMPM at year 3, PCMH relative to usual care                            | 17.3% decrease (NS) |
|                                     |                                                                      |                                  |      | Economic: outpatient cost                                                                                              | % change in cost, PMPM at year 3, PCMH relative to usual care                            | 21.5% increase (NS) |
|                                     |                                                                      |                                  |      | Economic: ED cost                                                                                                      | % change in cost, PMPM at year 3, PCMH relative to usual care                            | 17.6% increase (NS) |
| <b>Heyworth L. et al, 2014 (61)</b> | Harvard Vanguard Medical Associates, MA<br>Adults<br>Mixed insurance | Pre-test/post-test<br>36+ months | Fair | Patient Satisfaction: reported as difference in difference P value, PCMH relative to usual care at end of intervention | Ease of scheduling                                                                       | 0.55                |
|                                     |                                                                      |                                  |      |                                                                                                                        | Ability to get desired appointment                                                       | 0.51                |
|                                     |                                                                      |                                  |      |                                                                                                                        | Promptness in returning calls                                                            | 0.21                |
|                                     |                                                                      |                                  |      |                                                                                                                        | Speed of registration                                                                    | 0.04                |
|                                     |                                                                      |                                  |      |                                                                                                                        | Wait before exam                                                                         | 0.82                |
|                                     |                                                                      |                                  |      |                                                                                                                        | Care provider information from specialist                                                | 0.65                |
|                                     |                                                                      |                                  |      |                                                                                                                        | Care provider explanation of problem                                                     | 0.05                |
|                                     |                                                                      |                                  |      |                                                                                                                        | Time spent with care provider                                                            | 0.05                |
|                                     |                                                                      |                                  |      |                                                                                                                        | Concern expressed by care provider                                                       | 0.02                |
|                                     |                                                                      |                                  |      |                                                                                                                        | Care provider instructions for follow up                                                 | 0.01                |
|                                     |                                                                      |                                  |      |                                                                                                                        | Sensitivity to patient's needs                                                           | 0.11                |
|                                     |                                                                      |                                  |      |                                                                                                                        | Care provider's knowledge of patient                                                     | 0.64                |

|                                      |                                                                                                                                                           |                                                    |      |                                |                                                                                                                     |                                                |
|--------------------------------------|-----------------------------------------------------------------------------------------------------------------------------------------------------------|----------------------------------------------------|------|--------------------------------|---------------------------------------------------------------------------------------------------------------------|------------------------------------------------|
|                                      |                                                                                                                                                           |                                                    |      |                                | Patient's confidence in care provider                                                                               | 0.1                                            |
|                                      |                                                                                                                                                           |                                                    |      |                                | Overall assessment of care                                                                                          | 0.1                                            |
|                                      |                                                                                                                                                           |                                                    |      |                                | Recommend care provider                                                                                             | 0.28                                           |
| <b>Fillmore H. et al, 2014 (41)</b>  | Community Care of North Carolina, NC<br>Adults<br>Medicaid                                                                                                | Quasi-experimental<br>36+ months                   | Fair | Economic: total cost           | Estimated cost difference in most-medically complex patients enrolled in PMCH relative to matched controls (\$PMPM) | Year 1: \$27.14 increase (SE \$44.91, p=.54)   |
|                                      |                                                                                                                                                           |                                                    |      |                                |                                                                                                                     | Year 2: \$52.54 decrease (SE \$18.77, p=.0051) |
|                                      |                                                                                                                                                           |                                                    |      |                                |                                                                                                                     | Year 3: \$80.75 decrease (SE \$17.33, p<.001)  |
|                                      |                                                                                                                                                           |                                                    |      |                                |                                                                                                                     | Year 4: \$72.65 decrease (SE \$17.02, p<.001)  |
|                                      |                                                                                                                                                           |                                                    |      |                                |                                                                                                                     | Year 5: \$120.69 decrease (SE \$17.16, p<.001) |
| <b>Rosenthal M. et al, 2013 (54)</b> | Rhode Island Chronic Care Sustainability Initiative, RI<br>Adults<br>Blue Cross Blue Shield of Rhode Island, Neighborhood Health Plan, United Health Care | Quasi-experimental pre/post cohort<br>24-35 months | Good | Utilization: outpatient visits | PCP visits incidence rate ratio, PCMH relative to usual care                                                        | IRR 1.01 (CI .927, 1.089)                      |
|                                      |                                                                                                                                                           |                                                    |      | Utilization: outpatient visits | Specialty care incidence rate ratio, PCMH relative to usual care                                                    | IRR 1.00 (CI .927, 1.072)                      |
|                                      |                                                                                                                                                           |                                                    |      | Utilization: admissions        | Inpatient hospitalizations, incidence rate ratio, PCMH relative to usual care                                       | IRR 0.97 (CI .855, 1.092)                      |

|                                    |                                                                                                                   |                                    |      |                                       |                                                                                                         |                                 |
|------------------------------------|-------------------------------------------------------------------------------------------------------------------|------------------------------------|------|---------------------------------------|---------------------------------------------------------------------------------------------------------|---------------------------------|
|                                    |                                                                                                                   |                                    |      | Utilization: admissions               | Ambulatory care sensitive Inpatient hospitalizations, incidence rate ratio, PCMH relative to usual care | IRR 0.97 (CI .496, 1.880)       |
|                                    |                                                                                                                   |                                    |      | Utilization: ED visits                | ED visits, incidence rate ratio, PCMH relative to usual care                                            | IRR 0.93 (CI .787, 1.095)       |
|                                    |                                                                                                                   |                                    |      | Utilization: ED visits                | Ambulatory care sensitive ED visits incidence rate ratio, PCMH relative to usual care                   | IRR 0.75 (CI .612, .922, p<.05) |
|                                    |                                                                                                                   |                                    |      | Utilization: prescription days supply | Prescription days of treatment provided, incidence rate ratio, PCMH relative to usual care              | IRR 1.02 (CI .958, 1.088)       |
|                                    |                                                                                                                   |                                    |      | Processes of care: screening          | Hgb A1c testing for patients with DM, odds ratio, PCMH relative to usual care                           | OR 1.29 (CI .95, 1.74)          |
|                                    |                                                                                                                   |                                    |      | Processes of care: screening          | Lipid testing for patients with DM, odds ratio, PCMH relative to usual care                             | OR 1.19 (CI .97, 1.45)          |
|                                    |                                                                                                                   |                                    |      | Processes of care: screening          | Retinopathy screening for patients with DM, odds ratio, PCMH relative to usual care                     | OR 1.06 (CI .87, 1.33)          |
|                                    |                                                                                                                   |                                    |      | Processes of care: screening          | Colorectal cancer screening, odds ratio, PCMH relative to usual care                                    | OR 1.40 (CI 0.79, 2.47)         |
|                                    |                                                                                                                   |                                    |      | Processes of care: screening          | Breast cancer screening, odds ratio, PCMH relative to usual care                                        | OR 0.99 (CI .87, 1.12)          |
|                                    |                                                                                                                   |                                    |      | Processes of care: screening          | Cervical cancer screening, odds ratio, PCMH relative to usual care                                      | OR 0.94 (CI 0.80, 1.09)         |
| <b>Hochman M. et al, 2014 (62)</b> | University of Southern California Medical Center, CA<br>Adults<br>Mixed (free care > Medicaid > self pay > other) | Pre-test/post-test<br>12-23 months | Good | Utilization: ED visits                | Difference in difference visit rate, PCMH relative to usual care                                        | 1% increase (p=.92)             |
|                                    |                                                                                                                   |                                    |      | Utilization: admissions               | Difference in difference visit rate, PCMH relative to usual care                                        | 5% increase (p=.02)             |

|                                   |                                                                                                                           |                                    |      |                                                                                                                                                                                     |                                                                                                               |                        |
|-----------------------------------|---------------------------------------------------------------------------------------------------------------------------|------------------------------------|------|-------------------------------------------------------------------------------------------------------------------------------------------------------------------------------------|---------------------------------------------------------------------------------------------------------------|------------------------|
|                                   |                                                                                                                           |                                    |      | Patient Satisfaction: reported as difference in difference of patients who agree or strongly agree that services are adequate before and after program, PCMH relative to usual care | Test result communication                                                                                     | 4% increase (p=.96)    |
|                                   |                                                                                                                           |                                    |      |                                                                                                                                                                                     | Ease of completing tests                                                                                      | 10% decrease (p=.03)   |
|                                   |                                                                                                                           |                                    |      |                                                                                                                                                                                     | Ease of making specialist appointments                                                                        | 5% decrease (p=.99)    |
|                                   |                                                                                                                           |                                    |      |                                                                                                                                                                                     | Continuity with regular physician                                                                             | 5% decrease (p=.36)    |
|                                   |                                                                                                                           |                                    |      |                                                                                                                                                                                     | Physician knows information about you                                                                         | 11% increase (p=.06)   |
|                                   |                                                                                                                           |                                    |      |                                                                                                                                                                                     | Ease of making urgent appointments                                                                            | 36% increase (p<.001)  |
|                                   |                                                                                                                           |                                    |      |                                                                                                                                                                                     | Ease of making routine appointments                                                                           | 20% increase (p=.04)   |
|                                   |                                                                                                                           |                                    |      |                                                                                                                                                                                     | Telephone access during regular hours                                                                         | 39% increase (p<.001)  |
|                                   |                                                                                                                           |                                    |      |                                                                                                                                                                                     | Telephone access after hours                                                                                  | 42% increase (p=.02)   |
|                                   |                                                                                                                           |                                    |      |                                                                                                                                                                                     | Overall rate of care as good or excellent                                                                     | 21% increase (p<.01)   |
|                                   |                                                                                                                           |                                    |      |                                                                                                                                                                                     | Total composite patient satisfaction score                                                                    | 8% increase (p=.04)    |
| <b>Werner R. et al, 2013 (55)</b> | Horizon Blue Cross Blue Shield of New Jersey, NJ<br>Adults<br>Horizon Blue Cross Blue Shield, insurance mix not specified | Pre-test/post-test<br>24-35 months | Good | Utilization: ED visits                                                                                                                                                              | ED visits, adjusted difference in difference estimates, PCMH relative to usual care                           | 0.001 increase (p=.53) |
|                                   |                                                                                                                           |                                    |      | Utilization: ED visits                                                                                                                                                              | Ambulatory care sensitive ED visits, adjusted difference in difference estimates, PCMH relative to usual care | 0.000 (p=.73)          |
|                                   |                                                                                                                           |                                    |      | Utilization: admissions                                                                                                                                                             | Inpatient admissions, adjusted difference in difference estimates, PCMH relative to usual care                | 0.000 (p=.78)          |
|                                   |                                                                                                                           |                                    |      | Utilization: admissions                                                                                                                                                             | Ambulatory care sensitive inpatient admissions, adjusted difference in                                        | 0.000 (p=.71)          |



|                                    |                                  |                     |      |                              |                                                                                                                     |                       |
|------------------------------------|----------------------------------|---------------------|------|------------------------------|---------------------------------------------------------------------------------------------------------------------|-----------------------|
|                                    |                                  |                     |      |                              | difference estimates, PCMH relative to usual care                                                                   |                       |
|                                    |                                  |                     |      | Utilization: readmissions    | 30 day readmissions, adjusted difference in difference estimates, PCMH relative to usual care                       | 0.004 (p=.83)         |
|                                    |                                  |                     |      | Economic: total cost         | Paid amount PMPQ, adjusted difference in difference estimates, PCMH relative to usual care                          | 0.024 (p=.60)         |
|                                    |                                  |                     |      | Processes of care: screening | Hgb A1c testing in patients with DM, adjusted difference in difference estimates, PCMH relative to usual care       | -0.062 (p=.18)        |
|                                    |                                  |                     |      | Processes of care: screening | Retinopathy screening in patients with DM, adjusted difference in difference estimates, PCMH relative to usual care | 0.025 (p=.25)         |
|                                    |                                  |                     |      | Processes of care: screening | Lipid testing in patients with DM, adjusted difference in difference estimates, PCMH relative to usual care         | -0.055 (p=.16)        |
|                                    |                                  |                     |      | Processes of care: screening | Nephropathy screening in patients with DM, adjusted difference in difference estimates, PCMH relative to usual care | -0.066 (p=.05)        |
|                                    |                                  |                     |      | Processes of care: screening | Colorectal cancer screening, adjusted difference in difference estimates, PCMH relative to usual care               | 0.017 (p=.18)         |
|                                    |                                  |                     |      | Processes of care: screening | Breast cancer screening, adjusted difference in difference estimates, PCMH relative to usual care                   | 0.022 (p<.0001)       |
|                                    |                                  |                     |      | Processes of care: screening | Cervical cancer screening, adjusted difference in difference estimates, PCMH relative to usual care                 | -0.006 (p=.46)        |
|                                    |                                  |                     |      | Processes of care: screening | Chlamydia screening, adjusted difference in difference estimates, PCMH relative to usual care                       | -0.011 (p=.74)        |
|                                    |                                  |                     |      | Processes of care: screening | Lipid testing, adjusted difference in difference estimates, PCMH relative to usual care                             | -0.072 (p=.16)        |
| <b>Fifield J. et al, 2013 (56)</b> | Emblem Health Inc., NY<br>Adults | RCT<br>12-23 months | Good | Utilization: ED visits       | ED visit count ratio                                                                                                | 32% decrease (p=.069) |

|                                            |                                                                                                                                        |                                             |      |                                  |                                               |                                         |
|--------------------------------------------|----------------------------------------------------------------------------------------------------------------------------------------|---------------------------------------------|------|----------------------------------|-----------------------------------------------|-----------------------------------------|
|                                            | Mixed                                                                                                                                  |                                             |      |                                  |                                               |                                         |
|                                            |                                                                                                                                        |                                             |      | Utilization:<br>admissions       | Hospital admission count ratio                | 60% increase (p=.212)                   |
|                                            |                                                                                                                                        |                                             |      | Economic: total cost             | Total cost                                    | 1.1% decrease (p=.952)                  |
|                                            |                                                                                                                                        |                                             |      | Economic: ED cost                | ED costs                                      | 25% decrease (p=.214)                   |
|                                            |                                                                                                                                        |                                             |      | Economic: outpatient<br>cost     | Outpatient costs                              | 9% increase (p=.657)                    |
|                                            |                                                                                                                                        |                                             |      | Economic:<br>administrative cost | Hospital administrative costs                 | 8% decrease (p=.578)                    |
|                                            |                                                                                                                                        |                                             |      | Process of care:<br>screening    | Breast cancer screening                       | 10% increase (p=.029)                   |
|                                            |                                                                                                                                        |                                             |      | Process of care:<br>screening    | Lipid screening                               | 4% increase (p.401)                     |
|                                            |                                                                                                                                        |                                             |      | Process of care:<br>screening    | Nephropathy screening                         | 2% increase (p=.474)                    |
|                                            |                                                                                                                                        |                                             |      | Process of care:<br>screening    | Chlamydia screening                           | 23% increase (p=.323)                   |
|                                            |                                                                                                                                        |                                             |      | Process of care:<br>screening    | Lipid screening in patients with DM           | 1% increase (p=.757)                    |
|                                            |                                                                                                                                        |                                             |      | Process of care:<br>screening    | Hgb A1c screening in patients with DM         | 0% change (p=.957)                      |
|                                            |                                                                                                                                        |                                             |      | Process of care:<br>screening    | Blood pressure control                        | 262% increase (p=.02)                   |
|                                            |                                                                                                                                        |                                             |      | Process of care:<br>screening    | Blood pressure control in patients with<br>DM | 30% decrease (p=.127)                   |
|                                            |                                                                                                                                        |                                             |      | Process of care:<br>screening    | Lipid control in patients with DM             | 14% decrease (p=.306)                   |
|                                            |                                                                                                                                        |                                             |      | Process of care:<br>screening    | Hgb A1c control in patients with DM           | 3% decrease (p=.568)                    |
| <b>Schmidt L.<br/>et al, 2013<br/>(60)</b> | Safety net clinics<br>in Orleans Parish,<br>New Orleans LA<br><br>Adults in safety net<br>clinics<br><br>No insurance mix<br>specified | Pre-test/post-<br>test<br><br>Not specified | Poor | Patient satisfaction:            | % positive score on Accessibility             | Low: 74, Medium 65,<br>High 59 (p=.005) |

|                                     |                                                                                                                                                       |                                    |      |                                                                                             |                                                                                                   |                                                                     |
|-------------------------------------|-------------------------------------------------------------------------------------------------------------------------------------------------------|------------------------------------|------|---------------------------------------------------------------------------------------------|---------------------------------------------------------------------------------------------------|---------------------------------------------------------------------|
|                                     |                                                                                                                                                       |                                    |      | Bivariate association between patient experience ratings and magnitude of clinic PCMH score | % positive score on coordination                                                                  | Low: 24, Medium 29, High 37 (p=.006)                                |
|                                     |                                                                                                                                                       |                                    |      |                                                                                             | % positive score on confidence in quality/safety                                                  | Low: 79, Medium 62, High 69 (p<.001)                                |
| <b>Isetts B. et al, 2012 (80)</b>   | Fairview Health Services of Minneapolis, MN<br>Adults<br>Mixed                                                                                        | Pre-test/post-test<br>12-23 months | Fair | Economic: total cost                                                                        | Difference in difference percent change in total cost \$PMPM, PCMH relative to non-PCMH practices | 11% (\$354 relative to \$420 PMPM, p=0.05)                          |
| <b>Carrillo J. et al, 2011 (27)</b> | NY Presby Regional Health Collaborative, NY<br>Hispanic adults with DM, asthma, or CHF<br>Mixed (Medicaid > Medicare > Self-pay > commercial > other) | Pre-test/post-test<br>6-11 months  | Fair | Utilization: ED visits                                                                      | ED visits per patient, PCHM relative to usual care                                                | 9.2% decrease (0.59 visits/patient to 0.53 visits/patient, p=0.001) |
|                                     |                                                                                                                                                       |                                    |      | Utilization: hospitalization                                                                | Hospitalizations per patient, PCHM relative to usual care                                         | 5.8% decrease (0.25 visits/patient to 0.24 visits/patient, p=.25)   |
| <b>Gabbay R. et al. 2011 (57)</b>   | Pennsylvania Governor's Office Health Care Reform, PA<br>Adults<br>Independence Blue Cross (44.5%),                                                   | Quasi-experimental<br>12-23 months | Fair | Process of care: screening                                                                  | Change in retinopathy screening rate in patients with DM, PCMH relative to usual care             | 10.8% increase (from 30.4% to 41.2%, p<.05)                         |

|                                 |                                                                                                    |                             |      |                                      |                                                                                          |                                             |
|---------------------------------|----------------------------------------------------------------------------------------------------|-----------------------------|------|--------------------------------------|------------------------------------------------------------------------------------------|---------------------------------------------|
|                                 | Keystone Mercy (20.1%), Aetna (19.3%), AmeriChoice (6.3%), HealthPartners (8.8%), and CIGNA (0.8%) |                             |      |                                      |                                                                                          |                                             |
|                                 |                                                                                                    |                             |      | Process of care: screening           | Change in foot exam screening rate in patients with DM, PCMH relative to usual care      | 18.4% increase (from 50.6% to 69.6%, p<.05) |
|                                 |                                                                                                    |                             |      | Process of care: screening           | Change in nephropathy screening rate in patients with DM, PCMH relative to usual care    | 6.4% increase (from 62.7% to 69.1%, p<.05)  |
|                                 |                                                                                                    |                             |      | Process of care: guideline adherence | Change in rate of aspirin prescription in patients with DM, PCMH relative to usual care  | 13.4% increase (from 50.8% to 64.2%, p<.05) |
|                                 |                                                                                                    |                             |      | Process of care: guideline adherence | Change in rate of statin prescription in patients with DM, PCMH relative to usual care   | 21.4% increase (from 36.1% to 57.5%, p<.05) |
|                                 |                                                                                                    |                             |      | Process of care: guideline adherence | Change in rate of ACEi/ARB prescription in patients with DM, PCMH relative to usual care | 13.3% increase (from 42.3% to 55.6%, p<.05) |
| <b>Lee K. et al, 2011 (81)</b>  | Jacksonville Urban Disparity Institute, FL<br>Adults<br>Free care / self pay                       | Retrospective<br>36+ months | Good | Clinical: Hgb A1c                    | Difference in Hgb A1c, PCMH relative to usual care                                       | 0.41% decrease (p=.275)                     |
| <b>Roby D. et al, 2010 (28)</b> | Orange County Health Care Coverage Institute, FL<br>Adults<br>Mixed                                | Retrospective<br>36+ months | Good | Utilization: ED visits               | Odds of ER visit, longer PCMH enrollment relative to less enrollment time                | OR 0.96 (0.92, 1.00, p<.05)                 |

|                                       |                                          |                                    |      |                           |                                                                                                                                                |                                                                       |
|---------------------------------------|------------------------------------------|------------------------------------|------|---------------------------|------------------------------------------------------------------------------------------------------------------------------------------------|-----------------------------------------------------------------------|
| <b>Hassaballa I. et al, 2015 (48)</b> | Whittier Street Health Center, MA        | Pre-test/post-test<br>24-35 months | Fair | Clinical: Hgb A1c         | Difference in outcome at 16 months in patients with DM, PCMH relative to usual care                                                            | 0.30 decrease in Hgb A1c, p=.016, ES 0.403                            |
|                                       | Adults                                   |                                    |      |                           |                                                                                                                                                |                                                                       |
|                                       | Mixed (predominantly self-pay)           |                                    |      |                           |                                                                                                                                                |                                                                       |
|                                       |                                          |                                    |      |                           |                                                                                                                                                |                                                                       |
|                                       |                                          |                                    |      | Clinical: blood pressure  | Difference in outcome at 16 months in patients with DM, PCMH relative to usual care                                                            | 11.60 mmHg decrease in SBP, 2.20 mmHg decrease in DBP, p=0.096, 0.027 |
|                                       |                                          |                                    |      | Clinical: lipids          | Difference in LDL at 16 months in patients with DM, PCMH relative to usual care                                                                | 2.20 mg/dL decrease (p=.139)                                          |
| <b>White B. et al, 2014 (82)</b>      | Oregon Health and Science University, OR | Retrospective<br>12-23 months      | Good | Utilization: readmissions | Unadjusted model estimates of rate of readmission between PCMH intervention and usual care based on slope of linear regression model over time | p=.05                                                                 |
|                                       | Adults                                   |                                    |      |                           |                                                                                                                                                |                                                                       |
|                                       | Mixed                                    |                                    |      |                           |                                                                                                                                                |                                                                       |

71 a. Pediatric patients included in study but not included in analysis

72 b. Included VA and Medicare admissions

## References:

69. Methodology Committee of the Patient-Centered Outcomes Research I. Methodological standards and patient-centeredness in comparative effectiveness research: the PCORI perspective. *JAMA*. 2012;307(15):1636-40.
- 73 70. Black N. Patient reported outcome measures could help transform healthcare. *BMJ*.  
74 2013;346:f167.
- 75 71. Jackson GL, Williams JW, Jr. Does PCMH "Work"?--The Need to Use Implementation Science  
76 to Make Sense of Conflicting Results. *JAMA Intern Med*. 2015;175(8):1369-70.
- 77 72. Liss DT, Fishman PA, Rutter CM, Grembowski D, Ross TR, Reid RJ. Specialty use among  
78 patients with treated hypertension in a patient-centered medical home. *J Gen Intern Med*.  
79 2014;29(5):732-40.
- 80 73. Edwards ST, Saha S, Prentice JC, Pizer SD. Preventing Hospitalization with Veterans Affairs  
81 Home-Based Primary Care: Which Individuals Benefit Most? *J Am Geriatr Soc*. 2017.
- 82 74. Wong ES, Rosland AM, Fihn SD, Nelson KM. Patient-Centered Medical Home Implementation  
83 in the Veterans Health Administration and Primary Care Use: Differences by Patient Comorbidity  
84 Burden. *J Gen Intern Med*. 2016;31(12):1467-74.
- 85 75. Yoon J, Rose DE, Canelo I, Upadhyay AS, Schectman G, Stark R, et al. Medical Home Features  
86 of VHA Primary Care Clinics and Avoidable Hospitalizations. *J Gen Intern Med*.  
87 2013;28(9):1188-94.
- 88 76. Domino ME, Jackson C, Beadles CA, Lichstein JC, Ellis AR, Farley JF, et al. Do primary care  
89 medical homes facilitate care transitions after psychiatric discharge for patients with multiple  
90 chronic conditions? *Gen Hosp Psychiatry*. 2016;39:59-65.
- 91 77. Farrell TW, Tomoiaia-Cotisel A, Scammon DL, Brunisholz K, Kim J, Day J, et al. Impact of an  
92 integrated transition management program in primary care on hospital readmissions. *J Healthc  
93 Qual*. 2015;37(1):81-92.
- 94 78. Markovitz AR, Alexander JA, Lantz PM, Paustian ML. Patient-centered medical home  
95 implementation and use of preventive services: the role of practice socioeconomic context.  
96 *JAMA Intern Med*. 2015;175(4):598-606.
- 97 79. Higgins S, Chawla R, Colombo C, Snyder R, Nigam S. Medical homes and cost and utilization  
98 among high-risk patients. *Am J Manag Care*. 2014;20(3):e61-71.
- 99 80. Isetts BJ, Brummel AR, e Oliveira DR, Moen DW. Managing drug-related morbidity and  
100 mortality in the patient-centered medical home. *Med Care*. 2012;50(11):997-1001.
- 101 81. Lee K, Palacio C, Alexandraki I, Stewart E, Mooradian AD. Increasing access to health care  
102 providers through medical home model may abolish racial disparity in diabetes care: evidence  
103 from a cross-sectional study. *J Natl Med Assoc*. 2011;103(3):250-6.
- 104 82. White B, Carney PA, Flynn J, Marino M, Fields S. Reducing hospital readmissions through  
105 primary care practice transformation. *Journal of Family Practice*. 2014;63(2):67-74.
